# Supplementary material for: Light and Temperature Shape the Phenylpropanoid Profile of Azolla filiculoides Fronds
Source: Front Plant Sci. 2021 Oct 21;12:727667. doi: 10.3389/fpls.2021.727667 (PMC8567065; doi:10.3389/fpls.2021.727667)
Supplement: Supplementary Table S3 — Metabolic data relative to the CC and BG samples. [file Table_3.XLSX]

## Sheet: All data
Table S3. Metabolic data relative to CC and BG samples. Single metabolite adduct type, reference m/z and formula are reported for compounds identification. Single metabolite (white rows), metabolite sub-classes (blue rows) and classes (orange rows) are shown together with their relative replicated and mean values, standard errors and statistical results (t-test, P < 0.05, FDR = 0.05). Compounds e…
						RAW DATA
			Identification parameters			Climatic chamber						Botanical garden
						EXP1			EXP2			EXP1			EXP2								METABOANALYST
CLASS	SUB-CLASS	Proposed compound	Adduct Type	Reference m/z	Formula	CC	CC2	CC3	CC4	CC5	CC6	BG	BG2	BG3	BG4	BG5	BG6	Average CC	SE CC	Average BG	SE BG	Compounds not included in the statistical analysis	Significance	Up/Down	De novo synthesis/Repression
PHENOLIC ACIDS	Hydroxybenzoic acids	Gallic acid	[M+H]+	171.029	C7H6O5	0	0	0	0	0	0	875279	943179	1055868	1028038	859954	942185	0	0	950750	32194		/	/	De novo synthesis
	SUMMATION Hydroxybenzoic acids					0	0	0	0	0	0	875279	943179	1055868	1028038	859954	942185	0	0	950750	32194		/	/	De novo synthesis
PHENOLIC ACIDS	Hydroxycinnamic acid and derivatives	p-Coumaric acid	[M+H-H2O]+	147.044	C9H8O3	219286	241880	264085	165977	257816	166674	194004	91733	52371	94791	59973	363497	219286	17899.6	142728	48744
		4-O-D-Glucopyranosyl-p-coumaric acid	[M+Cl]-	361.07	C15H18O8	62631	41452	89430	60326	58086	50030	56689	56689	56689	56689	22631	90746	60325.8	6632.27	56688.8	8793.61
		trans-Cinnamic acid	[M+H-H2O]+	131.049	C9H8O2	2771	12723	9359	9157	1924	1208	0	11421	21744	7465	9762	6503	6190.33	1968.37	9482.5	2927.15
		trans-2-Hydroxycinnamic acid	[M-H]-	163.04	C9H8O3	8959	8959	8959	2832	16166	7880	39435	25956	21888	14168	24569	29719	8959.17	1738.25	25955.8	3431.58		**	Up
		Methyl 4-hydroxycinnamate	[M-H]-	177.056	C10H10O3	0	0	15128	0	0	5395	0	0	23927	19414	0	0	3420.5	2501.76	7223.5	4605.54	√
		2-Glucosyloxy-4-methoxycinnamic acid	[M-H]-	355.103	C16H20O9	71103	17062	110249	70360	106222	51620	74827	46940	38645	35257	26832	59140	71102.7	14220.1	46940.2	7155.78
		2,5-Dimethoxycinnamic acid	[2M+H]+	417.154	C11H12O4	6161	0	0	2539	0	0	10900	9487	7842	8440	4960	4773	1450	1029.39	7733.67	1001.15		**	Up
		3-Hydroxy-4-methoxycinnamic acid	[M-H]-	193.051	C10H10O4	73381	73381	9930	26553	249516	7526	12758	107739	136398	119287	102169	324777	73381.2	37228.7	133855	42039.8
		3,4-Dihydroxycinnamic acid (L-alanine methyl ester) amide	[M-H]-	264.088	C13H15NO5	12348	12441	12348	11388	12348	13214	15749	3872	15749	37861	5515	15749	12347.8	236.658	15749.2	4948.87
		3,4,5-Trimethoxycinnamic acid	[M+H]+	239.091	C12H14O5	146304	85179	114349	75564	84544	41796	255842	258156	273140	237270	213079	242681	91289.3	14535.1	246695	8464.31		***	Up
		3,5-Dimethoxy-4-hydroxycinnamic acid	[M-H-CO2]-	179.071	C11H12O5	8343	35980	81457	72196	138613	151562	158572	102673	145668	168290	166356	143851	81358.5	22862.7	147568	9893.54
		1-O-Cinnamoyl-6-O-p-coumaroyl-.beta.-D-glucopyranose	[M+H-H2O]+	439.14	C24H24O9	0	0	0	0	0	0	0	0	0	0	0	0	0	0	0	0	√
		1-O-Cinnamoylglucose	[M+COOH]-	355.103	C15H18O7	66544	173590	30991	170959	306416	277255	122082	100627	37784	90867	102978	90865	170959	44776.4	90867.2	11596.1
		1,6-Bis-O-(4-hydroxycinnamoyl)glucose	[M+Na]+	495.126	C24H24O10	11332	10566	9976	12256	11266	12598	10811	10007	10825	10112	12367	9131	11332.3	403.583	10542.2	445.164
		Caffeic acid	[M+H-H2O]+	163.039	C9H8O4	10407	18782	1818	12943	13481	5501	52884	9859	60827	10183	34654	22917	10488.7	2475.35	31887.3	8799.26
		Caffeic acid phenethyl ester	[M+H]+	285.112	C17H16O4	4549	8455	46492	46492	86132	86833	5363	7297	7341	5314	2592	5581	46492.2	14611.4	5581.33	709.347
		Chicoric acid	[M+H]+	949.167	C22H18O12	0	14536	12880	5276	0	2376	3026	4414	11161	7879	11939	8857	5844.67	2618.59	7879.33	1457.96
		Sinapyl alcohol	[M+H-H2O]+	193.086	C11H14O4	28383	4626	0	0	0	2638	0	0	0	0	0	0	5941.17	4554	0	0	√
		Di-p-coumaroylputrescine	[2M-H]-	759.34	C22H24N2O4	68238	68238	43982	63145	19680	146146	47519	85550	47620	54766	35818	14449	68238.2	17360.7	47620.3	9538.28
		N1,N5,N10,N14-Tetra-trans-p-coumaroylspermine	[M+H]+	787.37	C46H50N4O8	16597	7278	1187	0	0	0	0	0	0	0	0	0	4177	2739.55	0	0	√
		4-Demethylsimmondsin 2'-ferulate	[M+Na]+	560.174	C25H31NO12	0	0	0	0	0	0	0	0	20216	0	0	22966	0	0	7197	4565.61	√
	SUMMATION Hydroxycinnamic acids					772357	823224	846305	807963	1362210	1022219	1060461	932420	945692	958639	836194	1433236	939046	91827.6	1.02777e+06	86174.3
PHENOLIC ACIDS	Quinic acid and derivatives	Quinic acid	[M+Na]+	215.053	C7H12O6	0	174219	174435	148049	13082	28435	1096755	1024592	1138215	966081	867119	885305	89703.3	34350.1	996344	45074.9		***	Up
		1,3-Dicaffeoylquinic acid	[M-C9H7O3]-	353.088	C25H24O12	181825	76815	76815	21699	76815	26922	2536544	2722333	2908487	2986325	2545546	2556681	76815.2	23490.6	2.70932e+06	80940.5		***	Up
		3-O-Caffeoyl-4-O-sinapoylquinic acid	[M-C9H7O3]-	397.114	C27H28O13	22146	74064	150154	107883	42263	47876	53323	13184	18850	16005	6405	5335	74064.3	19430.2	18850.3	7225.23
		3-O-Feruloylquinic acid	[2M-H]-	735.214	C17H20O9	77655611	94298270	75709355	110599865	104612402	133503330	119583570	110918839	28128282	5765624	11843142	7851517	9.93965e+07	8.89894e+06	4.73485e+07	2.17396e+07
		3-O-p-Coumaroylquinic acid	[M-H]-	337.093	C16H18O8	56027	41403	55559	52476	55559	72331	56769	96989	52400	51841	31281	949219	55559.2	4047.29	206416	148819
		4-O-Caffeoylquinic acid	[M-H-C7H10O5]-	179.035	C16H18O9	41539	153854	73503	11387	73503	87230	99070	161359	126078	5446336	4279096	4057441	73502.7	19600	2.36156e+06	1.01696e+06
		4,5-Di-O-caffeoylquinic acid methyl ester	[M-H]-	529.135	C26H26O12	14810	14810	5547	14810	25099	13785	26025067	26780337	27356893	26772060	24028803	24481983	14810.2	2534.54	2.59075e+07	553337		***	Up
		4,5-Dicaffeoylquinic acid	[M+H]+	517.134	C25H24O12	288155	408937	370326	403902	349401	320567	740691	840747	1007910	1009226	872991	839073	356881	19321.4	885106	43041		***	Up
	SUMMATION Quinic acid and derivatives					78260113	95242372	76615694	111360071	105248124	134100476	150191789	142558380	60737115	43013498	44474383	41626554	1.00138e+08	8.87206e+06	8.04336e+07	2.10657e+07
SUMMATION PHENOLIC ACIDS						79032470	96065596	77461999	112168034	106610334	135122695	152127529	144433979	62738675	45000175	46170531	44001975	1.01077e+08	8.9097e+06	82412144	2.10416e+07
COUMARINS	Coumarins	3-(1,1-Dimethylallyl)-8-hydroxy-7-methoxycoumarin	[M-H-CH3]-	244.074	C15H16O4	37595	72798	38294	9142	30145	37595	50099	27526	23963	100724	45201	23695	37594.8	8376.19	45201.3	12017.7
		3-[[(5-Methyl-1,3,4-thiadiazol-2-yl)thio]methyl]coumarilic acid	[M-H]-	305.006	C13H10N2O3S2	403888	2558159	1070106	1721210	389364	277910	168300	328703	240781	92042	88862	100668	1.07011e+06	372964	169893	39861.1
		3-Acetyl-7-diethylaminocoumarin	[M+H]+	260.128	C15H17NO3	29581	45146	19624	32847	25189	44697	24170	47795	44401	42168	45290	45205	32847.3	4226.3	41504.8	3544.52
		3-Cyano-6-methoxycoumarin	[M+H]+	202.05	C11H7NO3	21986	0	18105	0	4332	16125	9690	0	0	9725	0	13207	10091.3	3995.61	5437	2486.84	√
		3-Cyano-7-(diethylamino)coumarin	[2M+H]+	485.218	C14H14N2O2	139660	93092	93895	93876	48992	52294	69399	63668	64204	48026	46445	65645	86968.2	13606.5	59564.5	3988.78
		6,7-Dihydroxy-4-phenylcoumarin	[M-H]-	253.051	C15H10O4	34122	34122	26236	34122	42007	34122	7008	30336	46923	34404	94788	192586	34121.8	2036.03	67674.2	27658.7
		6,7-Dihydroxycoumarin-4-acetic acid	[M-H]-	235.025	C11H8O6	8095	0	3822	6792	8764	1817	58859	89052	31657	75335	12508	85741	4881.67	1453.65	58858.7	12641.3		**	Up
		6,7-Dimethyl-4-hydroxycoumarin	[M-H]-	189.056	C11H10O3	71104	42489	34338	56922	28144	63604	44184	7094	51612	62324	42166	123047	49433.5	6966.19	55071.2	15569.4
		7-Diethylamino-3-formylcoumarin	[M+H]+	246.113	C14H15NO3	46407	45402	37008	81999	37106	30522	0	0	0	0	0	0	46407.3	7516.61	0	0		/	/	Repression
		7-Hydroxy-3-phenylcoumarin	[M-H]-	237.056	C15H10O3	17774	0	29279	46818	63228	11516	52536	66306	56642	69358	28468	55251	28102.5	9586.44	54760.2	5905.96
		7-Hydroxy-4-methyl-3-phenylcoumarin	[M-H]-	251.071	C16H12O3	64483	36429	120282	71178	106492	28205	6181	44759	44501	59882	38831	38831	71178.2	15008.1	38830.8	7249.04
		7-Hydroxycoumarin-3-carboxylic acid	[M-H-CO2]-	161.024	C10H6O5	6493	82568	56472	106552	45544	41201	301539	325137	294753	130494	11758	141220	56471.7	14188.6	200817	51207
		7-Hydroxycoumarinyl .gamma.-linolenate	[M+H]+	423.253	C27H34O4	10720	20946	22592	12697	4416	12774	20077	14598	14758	18604	17610	17129	14024.2	2756.07	17129.3	877.977
		Fraxin	[M+Na]+	393.079	C16H18O10	5312	3058	2832	0	0	0	11834	0	10480	0	0	0	1867	906.914	3719	2358.59	√
		Coumarin-suberoylanilide hydroxamic acid	[2M-H]-	691.299	C18H22N2O5	34777	50324	84518	122525	55674	69564	148116	17935	38877	7907	49808	94907	69563.7	12651.4	59591.7	21614.1
	SUMMATION Coumarins					904699	3081475	1636466	2396680	885065	705821	950468	1062909	953072	741268	521735	983925	1601701	392637	868896	81939.4
SUMMATION COUMARINS						904699	3081475	1636466	2396680	885065	705821	950468	1062909	953072	741268	521735	983925	1601701	392637	868896	81939.4
FLAVONOIDS	Anthocyanins / Anthocyanidins	Cyanin cation	[M+OH-H]-	627.157	C27H31O16	125292	54594	21536	54594	22229	49320	61022	24645	13408	1926	37003	9864	54594.2	15455.7	24644.7	8825.92
		Cyanidin 3-O-lathyroside cation	[Cat-2H]-	579.135	C26H29O15	20250	36675	33039	20285	29115	6268	15335	23714	7950	40902	39219	15162	24272	4510.6	23713.7	5560.82
		Delphinidin 3-galactoside cation	[M+OH-H]-	481.099	C21H21O12	226780	21228	54331	43352	425300	154198	125488	228402	310622	441747	258387	208557	154198	62903.6	262200	43706
		Malvidin 3,5-diglucoside cation	[Cat]+	655.188	C29H35O17	0	0	0	104401	0	0	0	0	0	39047	0	0	17400.2	0	6507.83	0	√
		Delphinidin-3,5-diglucoside cation	[M+OH-H]-	643.152	C27H31O17	19075	30529	5968	2854	39136	16889	73388	73949	62467	67403	4551	25793	19075.2	5695.99	51258.5	11861.6
		Pelargonidin cation	[M+NH4]+	289.071	C15H11O5	93876	128329	117383	168334	5837	102752	67854	197847	194357	175658	97908	94082	102752	22091.1	137951	23546.1
	SUMMATION Anthocyanins / Anthocyanidins					485273	271355	232257	289419	521617	329427	343087	548557	588804	727636	437068	353458	354891	48904.5	499768	61133.3
FLAVONOIDS	Chalcone and derivatives	Isoliquiritin	[2M+H]+	837.26	C21H22O9	2588	10133	4806	2811	3955	4544	37233	58451	77961	93441	76242	61529	4806.17	1126.49	67476.2	7942.32		***	Up
		2-Hydroxy-3-methoxychalcone	[M-H]-	253.087	C16H14O3	4182	23124	35872	47275	56197	55333	109070	221688	242879	125511	162703	159862	36997.2	8328.74	170286	21471.1		***	Up
		2'-Hydroxy-3,4,4',5-tetramethoxychalcone	[M-H]-	343.119	C19H20O6	22432	171404	80510	207607	117654	106315	41653	192126	214484	91525	202730	131904	117654	26805.5	145737	28337.3
		2',4'-Dihydroxy-3'-(2-hydroxybenzyl)-6'-methoxychalcone	[2M-H]-	751.255	C23H20O5	37566	9272	0	62719	30975	62618	104619	141177	97406	69520	70395	101321	33858.3	10697.3	97406.3	10786.5		**	Up
		4-Benzyloxy-2'-hydroxy-3,4',6'-trimethoxychalcone	[M-H]-	419.15	C25H24O6	81019	122581	4861	24686	78245	101476	135540	117930	90787	155672	2854	124572	68811.3	18468.8	104559	22124.8
		4',6'-Dimethoxy-2'-hydroxy-4-methylchalcone	[M-H]-	297.113	C18H18O4	51659	51659	43184	51659	51659	60133	17313	8336	37807	17313	16668	6439	51658.8	2188.11	17312.7	4543.31		***	Down
		4',6'-Dimethoxy-4-dimethylamino-2'-hydroxychalcone	[M+H]+	328.154	C19H21NO4	2415491	2324766	2465354	2169835	1797237	2017042	3023614	1010607	1010607	4449	1010607	3759	2.19829e+06	104722	1.01061e+06	450122
	SUMMATION Chalcones and derivatives					2614937	2712939	2634587	2566592	2135922	2407461	3469042	1750315	1771931	557431	1542199	589386	2512073	85895.9	1613384	434205
FLAVONOIDS	Dihydroxychalcones	2,2'-Dihydroxychalcone	[M-H]-	239.071	C15H12O3	1905	35246	2429	7218	11700	11700	59673	57393	95836	119315	17873	7946	11699.7	5021.27	59672.7	17600.2
		2',6'-Dihydroxy 4,4'-dimethoxydihydrochalcone	[2M-H]-	603.224	C17H18O5	204036	312911	213328	204055	259041	172040	76442	21005	62999	90481	120120	87606	227568	20548.1	76442.2	13519.7		***	Down
		2',6'-Dihydroxy 4'-methoxydihydrochalcone	[M-H]-	271.098	C16H16O4	48820	7546	35136	30186	49636	39494	33051	27354	38747	33051	33051	33051	35136.3	6330.36	33050.8	1470.83
		Phlorizin	[M+H-H2O]+	419.134	C21H24O10	0	3141	0	3828	0	0	0	0	0	0	0	0	1161.5	739.932	0	0	√
		6''-O-Acetylphloridzin	[M+Cl]-	513.117	C23H26O11	5158	0	46028	41604	0	0	32647	98665	113663	55686	65435	26513	15465	9020.49	65434.8	14277.2		*	Up
	SUMMATION Dihydroxychalcones					259919	355703	296921	283063	320377	223234	201813	204417	311245	298533	236479	155116	289870	18884	234600	24677.3
FLAVONOIDS	Flavanones	Naringenin	[M+H-H2O]+	255.065	C15H12O5	79274	153565	109997	119564	34852	72206	23476	16515	28049	63607	74344	65614	94909.7	16973.3	45267.5	10318
		Liquiritin	[M+Cl]-	453.096	C21H22O9	7103	58051	58051	75421	58051	91628	60074	42789	45603	89190	62712	60074	58050.8	11582.8	60073.7	6740.13
		3,5,7,3',4'-Pentahydroxyflavanone	[M-H]-	303.051	C15H12O7	93003	15488	337751	29989	102820	37871	349840	439202	485140	356514	260616	616308	102820	49138.8	417937	50819.7		**	Up
		5,7-Dimethoxy-4'-hydroxyflavanone	[M+H]+	301.107	C17H16O5	0	0	0	0	0	0	0	37477	19960	0	26979	0	0	0	14069.3	6691.08	√
		7-O-Methyleriodictyol	[2M-H]-	603.151	C16H14O6	17421	21397	6537	7744	19820	64531	0	0	15458	0	28014	0	22908.3	8703.17	7245.33	4860.61
		Eriodictyol 7-O-neohesperidoside	[M+H]+	597.181	C27H32O15	0	0	0	0	0	0	23957	0	0	0	29915	30721	0	0	14098.8	6376.94	√
		Flavanomarein	[M+Cl]-	485.086	C21H22O11	17315385	3192359	2278423	1451068	1315611	2452135	114478	4209751	833852	111298	6204192	1921078	4.6675e+06	2.5452e+06	2.23244e+06	1.01197e+06
		Flavanone 7-O-.beta.-D-glucoside	[M-H]-	401.124	C21H22O8	1785	75710	82402	137171	75710	81480	21916	36022	27054	27054	23223	27054	75709.7	17626.2	27053.8	2012.47
		Flavanone diacetylhydrazone	[M+Na]+	345.121	C19H18N2O3	2732856	2640033	2641254	2653127	2233459	2297657	3501524	2665296	2832813	2995986	3029941	2851677	2.53306e+06	86150.8	2.97954e+06	117176		*	Up
		Helichrysin B	[M-H]-	433.114	C21H22O10	85153	136000	270382	404951	495147	398215	326721	425298	170633	203933	229552	312320	298308	66497.8	278076	38561.2
		Pinocembrin	[2M-H]-	511.14	C15H12O4	84561	21859	58823	14415	36521	2945	125718	5796	174146	84499	107786	9051	36520.7	12431.4	84499.3	27181.1
	SUMMATION Flavanones					20416541	6314462	5843620	4893450	4371991	5498668	4523747	7840669	4612748	3932081	10020380	5863176	7.88979e+06	2.52097e+06	6.13213e+06	963424
FLAVONOIDS	Isoflavones	4'-Acetoxy-7-hydroxy-6-methoxyisoflavone	[M-H]-	325.072	C18H14O6	29997	8641	10507	22233	14512	47509	58635	0	35823	0	1769	50597	22233.2	6002.81	24470.7	11093
		4',5,7-Trihydroxy-6,8-diprenylisoflavone	[M-H]-	405.171	C25H26O5	63105	74098	91618	31685	87072	31054	0	61428	4405	6665	23861	4411	63105.3	10836.3	16795	9545.68		**	Down
		4',7-Dimethoxyisoflavone	[M+H]+	283.097	C17H14O4	0	0	1345	0	0	0	0	0	0	0	0	0	224.167	0	0	0	√
		6''-O-Acetyldaidzin	[M+H]+	459.129	C23H22O10	6091	6762	7495	3322	6965	5909	0	0	0	0	0	0	6090.67	602.379	0	0		/	/	Repression
		6''-O-Malonyldaidzin	[M+H]+	503.118	C24H22O12	61888	28045	28726	28706	39906	31095	23296	25905	10322	20885	20608	19922	36394.3	5409.77	20156.3	2163.4
		6''-O-Malonylgenistin	[M+H]+	519.113	C24H22O13	2110	2059	2189	2119	2119	2119	64007	52093	62000	87275	64164	62851	2119.17	16.9124	65398.3	4750.85		***	Up
		Cuneatin 7-glucoside	[M+Na]+	497.105	C23H22O11	0	0	0	0	0	0	1316	0	0	0	4043	0	0	0	893.167	665.613	√
		Formononetin	[M+H]+	269.081	C16H12O4	0	0	0	4084	13158	17056	0	0	0	0	0	0	5716.33	3080.37	0	0	√
	SUMMATION Isoflavones					163191	119605	140535	88065	150574	117686	145938	139426	112550	114825	110402	137781	129943	11036.5	126820	6484.9
FLAVONOIDS	Flavones	Apiin	[M+Cl]-	599.117	C26H28O14	30472	61901	27092	39586	39586	38880	38728	38728	74948	57163	8478	14321	39586.2	4958.57	38727.7	10267.3
		Apigenin	[M-H]-	269.046	C15H10O5	92653	73012	0	0	8422	10157	88391	49491	273891	127135	113284	205849	30707.3	16764.8	143007	33636.9		*	Up
		3,8''-Biapigenin	[M+COOH]-	583.088	C30H18O10	149984	197468	189014	287156	220711	293874	595324	282689	357547	490870	454952	489784	223034	23297.1	445194	45018		**	Up
		Luteolin	[2M-H]-	571.088	C15H10O6	6138	140660	140660	154385	208153	193962	338586	186066	67861	182853	216831	124200	140660	29258	186066	37425
		Luteolin 7-methyl ether	[2M-H]-	599.12	C16H12O6	184428	470268	12073	0	5531	0	1512596	2786477	1512596	238714	1512596	1512596	112050	77462	1.5126e+06	328915		**	Up
		Luteolin-7,3'-di-O-glucoside	[M+Cl]-	645.123	C27H30O16	246479	225866	119156	126343	573973	63377	90929	207643	130579	144517	93994	113973	225866	75121.7	130272	17624.7
		3,4-Diphenylmethylideneluteolin	[M-H]-	449.103	C28H18O6	7921372	27173652	4727103	83104	8003543	112486	220573	146698	132138	2160559	0	92282	8.00354e+06	4.09568e+06	458708	341647
		7-O-Benzylluteolin	[M-H]-	375.087	C22H16O6	78206	11295	57194	106190	49626	28585	100830	17191	26408	15580	108728	53747	55182.7	13904.8	53747.3	17107.7
		8-C-(2-Rhamnosyl-6-deoxyhexopyranosulyl)luteolin	[M-H]-	575.141	C27H28O14	18779	21086	17432	18779	10310	26286	9428	0	18758	32777	0	49317	18778.7	2123.01	18380	8000.63
		3,7-Dihydroxy-3',4'-dimethoxyflavone	[M+H]+	315.086	C17H14O6	0	0	5161	0	17555	23292	4682	4682	5064	4682	4193	4788	7668	4181.47	4681.83	114.932
		3',4'-Dihydroxy-.alpha.-naphthoflavone	[M-H]-	303.066	C19H12O4	307520	307520	307520	309861	291998	320700	205985	963070	1234541	460739	465517	425993	307520	3742.21	625974	158474
		3',4',5,7-Tetrahydroxy-3,6,8-trimethoxyflavone	[M-H]-	375.072	C18H16O9	0	58681	58493	24666	69068	0	151842	110505	28472	53642	50267	9170	35151.3	12688.6	67316.3	21891.7
		3',4',5,7-Tetrahydroxy-6,8-dimethoxyflavone	[M-H-CH3]-	330.038	C17H14O8	126679	43115	72861	3248	96440	46641	31158	501809	251114	272630	179841	399230	64830.7	17779.9	272630	67313.2		*	Up
		3',4',5',5,6,7-Hexamethoxyflavone	[M+Na]+	425.121	C21H22O8	6802	2759	3949	2285	3949	3949	3413	6344	3171	2465	2415	2669	3948.83	640.953	3412.83	608.21
		4',5,7-Trihydroxy 3,3',6,8-tetramethoxyflavone	[M-H]-	389.088	C19H18O9	22079428	2026599	5194675	6986082	20294443	11316245	483417	1839771	162130	4877439	1840689	1840689	1.13162e+07	3.36143e+06	1.84069e+06	680235
		Baicalin	[M-H]-	445.078	C21H18O11	12701	20924	102882	238102	137668	105016	83518	472656	267673	299499	36872	116478	102882	33837.3	212783	67080.9
		Isoginkgetin	[M-H]-	565.114	C32H22O10	26663	46307	109347	46307	31835	17381	16633	37843	38578	83876	83876	242449	46306.7	13424	83875.8	33584.7
		Isoorientin	[2M-H]-	895.194	C21H20O11	129599	129599	170932	237891	29536	80035	594180	635350	467424	484353	714074	619834	129599	29385.2	585869	38489.1		***	Up
		Mosloflavone	[M-H-CH3]-	282.053	C17H14O5	15380	17024	34624	45144	24993	12791	46421	45408	71454	83819	22794	233016	24992.7	5175.66	83818.7	31097
		Saponarin	[M-H]-	593.151	C27H30O15	8793	31234	41446	39000	47380	19553	90148	0	0	44957	22248	0	31234.3	5959.12	26225.5	14737.8
		Skullcapflavone II	[M+H-C2H8O]+	327.05	C19H18O8	126478	230068	739	199294	97241	32608	165606	165606	15151	165606	165606	316060	114405	36803.6	165606	38847.2
		Volkensiflavone	[M+Cl]-	575.075	C30H20O10	48151	61474	17429	172175	8050	290149	145134	145134	123505	34773	48280	373979	99571.3	45022.3	145134	49799
		Wogonoside	[M-H]-	459.093	C22H20O11	0	337077	0	626688	211393	43592	0	0	0	0	0	0	203125	100894	0	0	√
	SUMMATION Flavones					31616705	31350512	11409782	9119598	30270011	13035967	5017522	8643161	5263003	10318648	6145535	7240424	2.11338e+07	4.48038e+06	7.10472e+06	844253
FLAVONOIDS	Flavonols	3'',4''-Di-O-p-coumaroylafzelin	[M+Na]+	747.168	C39H32O14	0	0	0	0	0	0	0	5886	0	0	5974	0	0	0	1976.67	1250.21	√
		6''-O-(3-Hydroxy-3-methylglutaroyl)hyperin	[M+H]+	609.145	C27H28O16	136572	191656	39287	98262	116444	116444	26251	152440	121690	174327	161356	98521	116444	20286.1	122431	22309.7
		6''-O-Malonylisoquercitrin	[M-H]-	549.089	C24H22O15	0	0	51517	0	0	49307	322439	28405	585314	342455	467465	37828	16804	10631.6	297318	92052.4		***	Up
		Afzelin	[M+Cl]-	467.075	C21H20O10	31147	0	379774	143859	87945	32020	58262	94532	29457	368839	111935	830526	112458	57379.8	248925	126460
		Isoquercitin	[M-H]-	463.088	C21H20O12	5925	15420	36804	156152	153353	83518	1511	5420485	145303	6530	80883	4609830	75195.3	27433.1	1710757	1.05039e+06
		Kaempferol 3-.alpha.-L-arabinoside	[M-H]-	417.083	C20H18O10	63354	291887	463193	28610	162388	164080	473554	424180	459971	487931	472075	126728	195585	65408.6	407406	56823.3
		Kaempferol 3-O-rutinoside	[M+H]+	595.166	C27H30O15	0	0	0	0	0	0	101409	127236	121651	153590	128679	128360	0	0	126821	6819.26		/	/	De novo synthesis
		Kaempferol 3-O-vicianoside	[M+Cl]-	615.112	C26H28O15	0	0	408813	886029	468455	35555	41442	709819	215623	63385	56575	217369	299809	145325	217369	103767
		Kaempferol 3-sophoroside 7-glucoside	[M+Na]+	795.195	C33H40O21	0	4768	0	5416	0	0	28411	46730	35291	39288	24878	25379	1697.33	1076.74	33329.5	3548.5		***	Up
		Miquelianin	[M-H]-	477.067	C21H18O13	84245	103447	119276	145432	113675	149583	358470	132162	207456	288373	229255	259340	119276	10184.5	245843	31277.2		**	Up
		Myricetin	[M+H]+	319.045	C15H10O8	0	0	0	0	0	0	37309	63548	68703	80585	52436	109638	0	0	68703.2	10154.8		/	/	De novo synthesis
		Quercetin	[2M-H]-	603.078	C15H10O7	184160	80966	348222	114674	150363	23791	124149	318295	248886	885706	111134	221602	150363	45607.2	318295	117860
		Quercetin 3,5,7,3',4'-pentamethyl ether	[M+Na]+	395.11	C20H20O7	11455	6469	8925	11077	10856	11586	7195	7472	8923	9169	3217	7195	10061.3	819.067	7195.17	871.471
		Quercitrin	[M+H]+	449.108	C21H20O11	44982	79126	83563	73627	57220	50361	6837	55478	18778	15022	16670	17572	64813.2	6567.33	21726.2	6969.78		**	Down
		Rutin	[M+H]+	611.161	C27H30O16	33814	33814	58989	8638	33814	33814	5524	9374	5069	3903	5524	3751	33813.8	6500.29	5524.17	832.68		**	Down
	SUMMATION Flavonols					595654	807553	1998363	1671776	1354513	750059	1592763	7590156	2272115	2919103	1922082	6693639	1.19632e+06	231333	3831643	1.06835e+06
FLAVONOIDS	3-deoxyanthocyanidins	Apigeninidin-5O glucoside cation	[Cat]+	433.113	C21H21O10	89322	135671	152460	151202	4201	87037	2964312	3513104	4016465	4990043	4833531	5569890	103316	23122.6	4.31456e+06	402319		***	Up
		Luteolinidin-5O glucoside cation	[M+H]+	417.118	C21H20O9	13578	22654	0	23858	0	0	127295	207265	287984	333740	276161	233559	10015	4708.04	244334	29495.8		***	Up
	SUMMATION 3-deoxyanthocyanidins					102900	158325	152460	175060	4201	87037	3091607	3720369	4304449	5323783	5109692	5803449	113330	25868.6	4.55889e+06	422617		***	Up
FLAVONOIDS	flavan-3-ols	(+)-Catechin	[M-H-H2O]-	271.061	C15H14O6	47450	47450	77532	9952	47450	54867	54250	45752	11076	9820	18268	227293	47450.2	8880.76	61076.5	34092.6
		(-)-Catechin gallate	[M-C7H5O5]+	273.076	C22H18O10	0	33349	35126	39230	0	37471	160777	182352	245553	187023	213391	201808	24196	7694.98	198484	11919.4		***	Up
		(-)-Epigallocatechin	[M-H]-	305.067	C15H14O7	34196	83690	118018	95361	147895	408209	248008	145249	83928	38479	134357	176975	147895	54303.3	137833	29729.2
		(-)-Gallocatechin 3-gallate	[M+CF3COO]-	571.071	C22H18O11	16214	114470	59736	32665	55771	55771	209682	14471781	25529	2986972	220104	7765	55771.2	13613.6	2.98697e+06	2.34461e+06
		Catechin 7-arabinofuranoside	[M+H]+	423.129	C20H22O10	14682	13390	18428	21540	9610	16983	33859	40775	39945	35874	32300	32490	15772.2	1699.24	35873.8	1515.23		***	Up
	SUMMATION Flavan-3-ols					112542	292349	308840	198748	260726	573301	706576	14885909	406031	3258168	618420	646331	291084	63584.1	3.42024e+06	2.3344e+06
FLAVONOIDS	Proanthocyanidins	Procyanidin A1	[M-H]-	575.12	C30H24O12	13593	95378	72012	76555	48938	125597	8482	360870	346912	385199	275406	555682	72012.2	15687.7	322092	73302.4		**	Up
		Procyanidin B2	[M-H]-	577.135	C30H26O12	39827	26271	21126	89173	55996	302643	67661	41515	549856	50584	816470	502675	89172.7	43852.9	338127	134725
		Procyanidin C1	[M-H]-	865.198	C45H38O18	203660	135353	446526	300196	24577	284446	287347	139683	307731	508355	589702	384985	232460	59606.9	369634	66179
	SUMMATION Proanthocyanidins					257080	257002	539664	465924	129511	712686	363490	542068	1204499	944138	1681578	1443342	393644	88585.4	1.02985e+06	209407
FLAVONOIDS	Curcuminoids	Demethoxycurcumin	[M-H]-	337.108	C20H18O5	61020	71455	28763	69240	97193	75968	95829	33531	20544	75310	44847	54012	67273.2	9154.76	54012.2	11292.8
	SUMMATION Curcuminoids					61020	71455	28763	69240	97193	75968	95829	33531	20544	75310	44847	54012	67273.2	9154.76	54012.2	11292.8
SUMMATION FLAVONOIDS						56685762	42711260	23585792	19820935	39616636	23811494	19551414	45898578	20867919	28469656	27868682	28980114	3.4372e+07	5.8724e+06	2.86061e+07	3.83666e+06
HYDROLYZABLE TANNINS	Hydrolyzable tannins	1,2,3,4-Tetragalloylglucose	[M-2H]2-	393.046	C34H28O22	326152	6553	447864	51608	144859	199172	110622	496427	424833	521380	303517	250726	196035	68249.5	351251	64735.5
		1,2,3,4,6-Pentagalloyl .beta.-D-glucose	[M-2H]2-	469.052	C41H32O26	6546	0	70079	21483	0	133856	153246	35993	32287	78487	30538	170752	38660.7	21882.2	83550.5	25940.4
		1,3,6-Tri-O-galloyl-.beta.-D-glucose	[M-H]-	635.089	C27H24O18	107532	14216	174056	59451	102745	158471	137663	279122	167120	119380	78238	44457	102745	24444	137663	33382.3
		3,4-Di-O-galloylquinic acid	[M-H]-	495.078	C21H20O14	124600	176489	252294	225443	222177	296503	213399	221074	309392	179547	31025	313295	216251	24385.8	211289	42281.7
		6-O-p-Coumaroyl-1,2-di-O-galloyl-.beta.-D-glucopyranose	[M-H]-	629.115	C29H26O16	91908	11786	116611	126979	21757	28312	95413	212008	160265	187697	123678	347120	66225.5	21030	187697	36228
		Quercetagetin-7-O-glucoside	[M-H]-	479.083	C21H20O13	5165	31345	2182	19506	0	22652	31856	140302	195383	300114	77432	96724	13475	5222.04	140302	39236.9		**	Up
	SUMMATION Hydrolyzable tannins					661903	240389	1063086	504470	491538	838966	742199	1384926	1289280	1386605	644428	1223074	633392	118167	1111752	135282
SUMMATION HYDROLYZABLE TANNINS						661903	240389	1063086	504470	491538	838966	742199	1384926	1289280	1386605	644428	1223074	633392	118167	1111752	135282
LIGNANS	Lignans	(-)-Hydroxymatairesinol	[M+H-H2O]+	357.133	C20H22O7	0	0	0	0	0	0	0	8462	0	6769	6024	7855	0	0	4851.67	1572.5	√
		(-)-Secoisolariciresinol	[M-H]-	361.166	C20H26O6	0	0	0	0	0	0	24371	13593	24953	0	25519	0	0	0	14739.3	4997	√
		(-)-Syringaresinol-4-O-.beta.-D-glucopyranoside	[M-H]-	579.208	C28H36O13	75463	67496	123392	43232	67733	75463	0	43405	0	61173	42569	87981	75463.2	10738.2	39188	14100.5
		Epipinoresinol-4,4'-di-O-.beta.-D-glucopyranoside	[M+Cl]-	717.217	C32H42O16	230497	273159	426078	297449	239938	28366	243216	327682	323918	1379	294558	40161	249248	52722.9	205152	59807.1
		Matairesinoside	[M-H]-	519.187	C26H32O11	61247	50367	31667	60452	48103	50367	16601	34849	0	0	0	0	50367.2	4377.58	8575	5912.87		***	Down
		Pinoresinol	[M+H-2H2O]+	323.128	C20H22O6	0	24428	0	8461	0	6210	4940	4301	0	0	4283	0	6516.5	3881.97	2254	1012.64	√
		Secoisolariciresinol diglucoside	[M+Cl]-	721.248	C32H46O16	152174	10560	199800	157475	0	57561	69257	57491	93272	134717	227611	225952	96261.7	34497.5	134717	31048.2
		Silydianin	[M+H2O-H]-	499.125	C25H22O10	42910	56648	59014	52364	12716	33809	49101	0	20643	13148	0	44276	42910.2	7145.99	21194.7	8708.22
	SUMMATION Lignans					562291	458230	839951	610972	368490	245566	378175	463427	437833	210417	564738	398370	514250	84522.1	408827	47800.3
SUMMATION LIGNANS						562291	458230	839951	610972	368490	245566	378175	463427	437833	210417	564738	398370	514250	84522.1	408827	47800.3
STILBENOIDS	Stilbenoids	Deoxyrhapontin	[M+Cl]-	439.116	C21H24O8	0	0	122375	155368	0	121974	33175	33175	16041	33175	69722	13761	66619.5	30201.3	33174.8	8177.53
		Oxyresveratrol	[2M-H]-	487.14	C14H12O4	54625	54625	65878	54625	82432	15564	320301	138600	138600	138600	9498	86002	54624.8	8991.89	138600	41812.7
		Resveratrol 4'-O-D-glucuronide	[M+H]+	405.118	C20H20O9	46838	95653	93606	102192	67025	63816	82092	82092	82092	86506	77377	82392	78188.3	9005.41	82091.8	1180.46
		Viniferin	[M-H]-	453.134	C28H22O6	58423	12615	302813	152534	112311	276510	41881	98283	15191	64580	99937	67607	152534	47611.6	64579.8	13353.8
	SUMMATION STILBENOIDS					159886	162893	584672	464719	261768	477864	477449	352150	251924	322861	256534	249762	351967	73822.9	318447	36246
SUMMATION STILBENOIDS						159886	162893	584672	464719	261768	477864	477449	352150	251924	322861	256534	249762	351967	73822.9	318447	36246

## Sheet: A
						RAW DATA
			Identification parameters			Climatic chamber						Botanical garden
						EXP1			EXP2			EXP1			EXP2
CLASS	SUB-CLASS	Proposed compound	Adduct Type	Reference m/z	Formula	CC	CC2	CC3	CC4	CC5	CC6	BG	BG2	BG3	BG4	BG5	BG6	Compounds not included in the statistical analysis
PHENOLIC ACIDS	Hydroxybenzoic acids	Gallic acid	[M+H]+	171.029	C7H6O5	0	0	0	0	0	0	875279	943179	1055868	1028038	859954	942185	Compounds not included in the statistical analysis
PHENOLIC ACIDS	Hydroxycinnamic acid and derivatives	p-Coumaric acid	[M+H-H2O]+	147.044	C9H8O3	219286	241880	264085	165977	257816	166674	194004	91733	52371	94791	59973	363497
		4-O-D-Glucopyranosyl-p-coumaric acid	[M+Cl]-	361.07	C15H18O8	62631	41452	89430	60326	58086	50030	56689	56689	56689	56689	22631	90746
		trans-Cinnamic acid	[M+H-H2O]+	131.049	C9H8O2	2771	12723	9359	9157	1924	1208	0	11421	21744	7465	9762	6503
		trans-2-Hydroxycinnamic acid	[M-H]-	163.04	C9H8O3	8959	8959	8959	2832	16166	7880	39435	25956	21888	14168	24569	29719
		Methyl 4-hydroxycinnamate	[M-H]-	177.056	C10H10O3	0	0	15128	0	0	5395	0	0	23927	19414	0	0
		2-Glucosyloxy-4-methoxycinnamic acid	[M-H]-	355.103	C16H20O9	71103	17062	110249	70360	106222	51620	74827	46940	38645	35257	26832	59140	√
		2,5-Dimethoxycinnamic acid	[2M+H]+	417.154	C11H12O4	6161	0	0	2539	0	0	10900	9487	7842	8440	4960	4773
		3-Hydroxy-4-methoxycinnamic acid	[M-H]-	193.051	C10H10O4	73381	73381	9930	26553	249516	7526	12758	107739	136398	119287	102169	324777
		3,4-Dihydroxycinnamic acid (L-alanine methyl ester) amide	[M-H]-	264.088	C13H15NO5	12348	12441	12348	11388	12348	13214	15749	3872	15749	37861	5515	15749
		3,4,5-Trimethoxycinnamic acid	[M+H]+	239.091	C12H14O5	146304	85179	114349	75564	84544	41796	255842	258156	273140	237270	213079	242681
		3,5-Dimethoxy-4-hydroxycinnamic acid	[M-H-CO2]-	179.071	C11H12O5	8343	35980	81457	72196	138613	151562	158572	102673	145668	168290	166356	143851
		1-O-Cinnamoyl-6-O-p-coumaroyl-.beta.-D-glucopyranose	[M+H-H2O]+	439.14	C24H24O9	0	0	0	0	0	0	0	0	0	0	0	0
		1-O-Cinnamoylglucose	[M+COOH]-	355.103	C15H18O7	66544	173590	30991	170959	306416	277255	122082	100627	37784	90867	102978	90865	√
		1,6-Bis-O-(4-hydroxycinnamoyl)glucose	[M+Na]+	495.126	C24H24O10	11332	10566	9976	12256	11266	12598	10811	10007	10825	10112	12367	9131
		Caffeic acid	[M+H-H2O]+	163.039	C9H8O4	10407	18782	1818	12943	13481	5501	52884	9859	60827	10183	34654	22917
		Caffeic acid phenethyl ester	[M+H]+	285.112	C17H16O4	4549	8455	46492	46492	86132	86833	5363	7297	7341	5314	2592	5581
		Chicoric acid	[M+H]+	949.167	C22H18O12	0	14536	12880	5276	0	2376	3026	4414	11161	7879	11939	8857
		Sinapyl alcohol	[M+H-H2O]+	193.086	C11H14O4	28383	4626	0	0	0	2638	0	0	0	0	0	0
		Di-p-coumaroylputrescine	[2M-H]-	759.34	C22H24N2O4	68238	68238	43982	63145	19680	146146	47519	85550	47620	54766	35818	14449	√
		N1,N5,N10,N14-Tetra-trans-p-coumaroylspermine	[M+H]+	787.37	C46H50N4O8	16597	7278	1187	0	0	0	0	0	0	0	0	0
		4-Demethylsimmondsin 2'-ferulate	[M+Na]+	560.174	C25H31NO12	0	0	0	0	0	0	0	0	20216	0	0	22966	√
PHENOLIC ACIDS	Quinic acid and derivatives	Quinic acid	[M+Na]+	215.053	C7H12O6	0	174219	174435	148049	13082	28435	1096755	1024592	1138215	966081	867119	885305	√
		1,3-Dicaffeoylquinic acid	[M-C9H7O3]-	353.088	C25H24O12	181825	76815	76815	21699	76815	26922	2536544	2722333	2908487	2986325	2545546	2556681
		3-O-Caffeoyl-4-O-sinapoylquinic acid	[M-C9H7O3]-	397.114	C27H28O13	22146	74064	150154	107883	42263	47876	53323	13184	18850	16005	6405	5335
		3-O-Feruloylquinic acid	[2M-H]-	735.214	C17H20O9	77655611	94298270	75709355	110599865	104612402	133503330	119583570	110918839	28128282	5765624	11843142	7851517
		3-O-p-Coumaroylquinic acid	[M-H]-	337.093	C16H18O8	56027	41403	55559	52476	55559	72331	56769	96989	52400	51841	31281	949219
		4-O-Caffeoylquinic acid	[M-H-C7H10O5]-	179.035	C16H18O9	41539	153854	73503	11387	73503	87230	99070	161359	126078	5446336	4279096	4057441
		4,5-Di-O-caffeoylquinic acid methyl ester	[M-H]-	529.135	C26H26O12	14810	14810	5547	14810	25099	13785	26025067	26780337	27356893	26772060	24028803	24481983
		4,5-Dicaffeoylquinic acid	[M+H]+	517.134	C25H24O12	288155	408937	370326	403902	349401	320567	740691	840747	1007910	1009226	872991	839073
COUMARINS	Coumarins	3-(1,1-Dimethylallyl)-8-hydroxy-7-methoxycoumarin	[M-H-CH3]-	244.074	C15H16O4	37595	72798	38294	9142	30145	37595	50099	27526	23963	100724	45201	23695
		3-[[(5-Methyl-1,3,4-thiadiazol-2-yl)thio]methyl]coumarilic acid	[M-H]-	305.006	C13H10N2O3S2	403888	2558159	1070106	1721210	389364	277910	168300	328703	240781	92042	88862	100668
		3-Acetyl-7-diethylaminocoumarin	[M+H]+	260.128	C15H17NO3	29581	45146	19624	32847	25189	44697	24170	47795	44401	42168	45290	45205
		3-Cyano-6-methoxycoumarin	[M+H]+	202.05	C11H7NO3	21986	0	18105	0	4332	16125	9690	0	0	9725	0	13207
		3-Cyano-7-(diethylamino)coumarin	[2M+H]+	485.218	C14H14N2O2	139660	93092	93895	93876	48992	52294	69399	63668	64204	48026	46445	65645	√
		6,7-Dihydroxy-4-phenylcoumarin	[M-H]-	253.051	C15H10O4	34122	34122	26236	34122	42007	34122	7008	30336	46923	34404	94788	192586
		6,7-Dihydroxycoumarin-4-acetic acid	[M-H]-	235.025	C11H8O6	8095	0	3822	6792	8764	1817	58859	89052	31657	75335	12508	85741
		6,7-Dimethyl-4-hydroxycoumarin	[M-H]-	189.056	C11H10O3	71104	42489	34338	56922	28144	63604	44184	7094	51612	62324	42166	123047
		7-Diethylamino-3-formylcoumarin	[M+H]+	246.113	C14H15NO3	46407	45402	37008	81999	37106	30522	0	0	0	0	0	0
		7-Hydroxy-3-phenylcoumarin	[M-H]-	237.056	C15H10O3	17774	0	29279	46818	63228	11516	52536	66306	56642	69358	28468	55251
		7-Hydroxy-4-methyl-3-phenylcoumarin	[M-H]-	251.071	C16H12O3	64483	36429	120282	71178	106492	28205	6181	44759	44501	59882	38831	38831
		7-Hydroxycoumarin-3-carboxylic acid	[M-H-CO2]-	161.024	C10H6O5	6493	82568	56472	106552	45544	41201	301539	325137	294753	130494	11758	141220
		7-Hydroxycoumarinyl .gamma.-linolenate	[M+H]+	423.253	C27H34O4	10720	20946	22592	12697	4416	12774	20077	14598	14758	18604	17610	17129
		Fraxin	[M+Na]+	393.079	C16H18O10	5312	3058	2832	0	0	0	11834	0	10480	0	0	0
		Coumarin-suberoylanilide hydroxamic acid	[2M-H]-	691.299	C18H22N2O5	34777	50324	84518	122525	55674	69564	148116	17935	38877	7907	49808	94907	√
FLAVONOIDS	Anthocyanins / Anthocyanidins	Cyanin cation	[M+OH-H]-	627.157	C27H31O16	125292	54594	21536	54594	22229	49320	61022	24645	13408	1926	37003	9864
		Cyanidin 3-O-lathyroside cation	[Cat-2H]-	579.135	C26H29O15	20250	36675	33039	20285	29115	6268	15335	23714	7950	40902	39219	15162
		Delphinidin 3-galactoside cation	[M+OH-H]-	481.099	C21H21O12	226780	21228	54331	43352	425300	154198	125488	228402	310622	441747	258387	208557
		Malvidin 3,5-diglucoside cation	[Cat]+	655.188	C29H35O17	0	0	0	104401	0	0	0	0	0	39047	0	0
		Delphinidin-3,5-diglucoside cation	[M+OH-H]-	643.152	C27H31O17	19075	30529	5968	2854	39136	16889	73388	73949	62467	67403	4551	25793	√
		Pelargonidin cation	[M+NH4]+	289.071	C15H11O5	93876	128329	117383	168334	5837	102752	67854	197847	194357	175658	97908	94082
FLAVONOIDS	Chalcone and derivatives	Isoliquiritin	[2M+H]+	837.26	C21H22O9	2588	10133	4806	2811	3955	4544	37233	58451	77961	93441	76242	61529
		2-Hydroxy-3-methoxychalcone	[M-H]-	253.087	C16H14O3	4182	23124	35872	47275	56197	55333	109070	221688	242879	125511	162703	159862
		2'-Hydroxy-3,4,4',5-tetramethoxychalcone	[M-H]-	343.119	C19H20O6	22432	171404	80510	207607	117654	106315	41653	192126	214484	91525	202730	131904
		2',4'-Dihydroxy-3'-(2-hydroxybenzyl)-6'-methoxychalcone	[2M-H]-	751.255	C23H20O5	37566	9272	0	62719	30975	62618	104619	141177	97406	69520	70395	101321
		4-Benzyloxy-2'-hydroxy-3,4',6'-trimethoxychalcone	[M-H]-	419.15	C25H24O6	81019	122581	4861	24686	78245	101476	135540	117930	90787	155672	2854	124572
		4',6'-Dimethoxy-2'-hydroxy-4-methylchalcone	[M-H]-	297.113	C18H18O4	51659	51659	43184	51659	51659	60133	17313	8336	37807	17313	16668	6439
		4',6'-Dimethoxy-4-dimethylamino-2'-hydroxychalcone	[M+H]+	328.154	C19H21NO4	2415491	2324766	2465354	2169835	1797237	2017042	3023614	1010607	1010607	4449	1010607	3759
FLAVONOIDS	Dihydroxychalcones	2,2'-Dihydroxychalcone	[M-H]-	239.071	C15H12O3	1905	35246	2429	7218	11700	11700	59673	57393	95836	119315	17873	7946
		2',6'-Dihydroxy 4,4'-dimethoxydihydrochalcone	[2M-H]-	603.224	C17H18O5	204036	312911	213328	204055	259041	172040	76442	21005	62999	90481	120120	87606
		2',6'-Dihydroxy 4'-methoxydihydrochalcone	[M-H]-	271.098	C16H16O4	48820	7546	35136	30186	49636	39494	33051	27354	38747	33051	33051	33051
		Phlorizin	[M+H-H2O]+	419.134	C21H24O10	0	3141	0	3828	0	0	0	0	0	0	0	0
		6''-O-Acetylphloridzin	[M+Cl]-	513.117	C23H26O11	5158	0	46028	41604	0	0	32647	98665	113663	55686	65435	26513	√
	Flavanones	Naringenin	[M+H-H2O]+	255.065	C15H12O5	79274	153565	109997	119564	34852	72206	23476	16515	28049	63607	74344	65614
		Liquiritin	[M+Cl]-	453.096	C21H22O9	7103	58051	58051	75421	58051	91628	60074	42789	45603	89190	62712	60074
FLAVONOIDS		3,5,7,3',4'-Pentahydroxyflavanone	[M-H]-	303.051	C15H12O7	93003	15488	337751	29989	102820	37871	349840	439202	485140	356514	260616	616308
		5,7-Dimethoxy-4'-hydroxyflavanone	[M+H]+	301.107	C17H16O5	0	0	0	0	0	0	0	37477	19960	0	26979	0
		7-O-Methyleriodictyol	[2M-H]-	603.151	C16H14O6	17421	21397	6537	7744	19820	64531	0	0	15458	0	28014	0	√
		Eriodictyol 7-O-neohesperidoside	[M+H]+	597.181	C27H32O15	0	0	0	0	0	0	23957	0	0	0	29915	30721
		Flavanomarein	[M+Cl]-	485.086	C21H22O11	17315385	3192359	2278423	1451068	1315611	2452135	114478	4209751	833852	111298	6204192	1921078	√
		Flavanone 7-O-.beta.-D-glucoside	[M-H]-	401.124	C21H22O8	1785	75710	82402	137171	75710	81480	21916	36022	27054	27054	23223	27054
		Flavanone diacetylhydrazone	[M+Na]+	345.121	C19H18N2O3	2732856	2640033	2641254	2653127	2233459	2297657	3501524	2665296	2832813	2995986	3029941	2851677
		Helichrysin B	[M-H]-	433.114	C21H22O10	85153	136000	270382	404951	495147	398215	326721	425298	170633	203933	229552	312320
		Pinocembrin	[2M-H]-	511.14	C15H12O4	84561	21859	58823	14415	36521	2945	125718	5796	174146	84499	107786	9051
FLAVONOIDS	Isoflavones	4'-Acetoxy-7-hydroxy-6-methoxyisoflavone	[M-H]-	325.072	C18H14O6	29997	8641	10507	22233	14512	47509	58635	0	35823	0	1769	50597
		4',5,7-Trihydroxy-6,8-diprenylisoflavone	[M-H]-	405.171	C25H26O5	63105	74098	91618	31685	87072	31054	0	61428	4405	6665	23861	4411
		4',7-Dimethoxyisoflavone	[M+H]+	283.097	C17H14O4	0	0	1345	0	0	0	0	0	0	0	0	0
		6''-O-Acetyldaidzin	[M+H]+	459.129	C23H22O10	6091	6762	7495	3322	6965	5909	0	0	0	0	0	0	√
		6''-O-Malonyldaidzin	[M+H]+	503.118	C24H22O12	61888	28045	28726	28706	39906	31095	23296	25905	10322	20885	20608	19922
		6''-O-Malonylgenistin	[M+H]+	519.113	C24H22O13	2110	2059	2189	2119	2119	2119	64007	52093	62000	87275	64164	62851
		Cuneatin 7-glucoside	[M+Na]+	497.105	C23H22O11	0	0	0	0	0	0	1316	0	0	0	4043	0
		Formononetin	[M+H]+	269.081	C16H12O4	0	0	0	4084	13158	17056	0	0	0	0	0	0	√
FLAVONOIDS	Flavones	Apiin	[M+Cl]-	599.117	C26H28O14	30472	61901	27092	39586	39586	38880	38728	38728	74948	57163	8478	14321	√
		Apigenin	[M-H]-	269.046	C15H10O5	92653	73012	0	0	8422	10157	88391	49491	273891	127135	113284	205849
		3,8''-Biapigenin	[M+COOH]-	583.088	C30H18O10	149984	197468	189014	287156	220711	293874	595324	282689	357547	490870	454952	489784
		Luteolin	[2M-H]-	571.088	C15H10O6	6138	140660	140660	154385	208153	193962	338586	186066	67861	182853	216831	124200
		Luteolin 7-methyl ether	[2M-H]-	599.12	C16H12O6	184428	470268	12073	0	5531	0	1512596	2786477	1512596	238714	1512596	1512596
		Luteolin-7,3'-di-O-glucoside	[M+Cl]-	645.123	C27H30O16	246479	225866	119156	126343	573973	63377	90929	207643	130579	144517	93994	113973
		3,4-Diphenylmethylideneluteolin	[M-H]-	449.103	C28H18O6	7921372	27173652	4727103	83104	8003543	112486	220573	146698	132138	2160559	0	92282
		7-O-Benzylluteolin	[M-H]-	375.087	C22H16O6	78206	11295	57194	106190	49626	28585	100830	17191	26408	15580	108728	53747
		8-C-(2-Rhamnosyl-6-deoxyhexopyranosulyl)luteolin	[M-H]-	575.141	C27H28O14	18779	21086	17432	18779	10310	26286	9428	0	18758	32777	0	49317
		3,7-Dihydroxy-3',4'-dimethoxyflavone	[M+H]+	315.086	C17H14O6	0	0	5161	0	17555	23292	4682	4682	5064	4682	4193	4788
		3',4'-Dihydroxy-.alpha.-naphthoflavone	[M-H]-	303.066	C19H12O4	307520	307520	307520	309861	291998	320700	205985	963070	1234541	460739	465517	425993
		3',4',5,7-Tetrahydroxy-3,6,8-trimethoxyflavone	[M-H]-	375.072	C18H16O9	0	58681	58493	24666	69068	0	151842	110505	28472	53642	50267	9170
		3',4',5,7-Tetrahydroxy-6,8-dimethoxyflavone	[M-H-CH3]-	330.038	C17H14O8	126679	43115	72861	3248	96440	46641	31158	501809	251114	272630	179841	399230
		3',4',5',5,6,7-Hexamethoxyflavone	[M+Na]+	425.121	C21H22O8	6802	2759	3949	2285	3949	3949	3413	6344	3171	2465	2415	2669
		4',5,7-Trihydroxy 3,3',6,8-tetramethoxyflavone	[M-H]-	389.088	C19H18O9	22079428	2026599	5194675	6986082	20294443	11316245	483417	1839771	162130	4877439	1840689	1840689
		Baicalin	[M-H]-	445.078	C21H18O11	12701	20924	102882	238102	137668	105016	83518	472656	267673	299499	36872	116478
		Isoginkgetin	[M-H]-	565.114	C32H22O10	26663	46307	109347	46307	31835	17381	16633	37843	38578	83876	83876	242449
		Isoorientin	[2M-H]-	895.194	C21H20O11	129599	129599	170932	237891	29536	80035	594180	635350	467424	484353	714074	619834
		Mosloflavone	[M-H-CH3]-	282.053	C17H14O5	15380	17024	34624	45144	24993	12791	46421	45408	71454	83819	22794	233016
		Saponarin	[M-H]-	593.151	C27H30O15	8793	31234	41446	39000	47380	19553	90148	0	0	44957	22248	0
		Skullcapflavone II	[M+H-C2H8O]+	327.05	C19H18O8	126478	230068	739	199294	97241	32608	165606	165606	15151	165606	165606	316060
		Volkensiflavone	[M+Cl]-	575.075	C30H20O10	48151	61474	17429	172175	8050	290149	145134	145134	123505	34773	48280	373979
		Wogonoside	[M-H]-	459.093	C22H20O11	0	337077	0	626688	211393	43592	0	0	0	0	0	0
FLAVONOIDS	Flavonols	3'',4''-Di-O-p-coumaroylafzelin	[M+Na]+	747.168	C39H32O14	0	0	0	0	0	0	0	5886	0	0	5974	0	√
		6''-O-(3-Hydroxy-3-methylglutaroyl)hyperin	[M+H]+	609.145	C27H28O16	136572	191656	39287	98262	116444	116444	26251	152440	121690	174327	161356	98521	√
		6''-O-Malonylisoquercitrin	[M-H]-	549.089	C24H22O15	0	0	51517	0	0	49307	322439	28405	585314	342455	467465	37828
		Afzelin	[M+Cl]-	467.075	C21H20O10	31147	0	379774	143859	87945	32020	58262	94532	29457	368839	111935	830526
		Isoquercitin	[M-H]-	463.088	C21H20O12	5925	15420	36804	156152	153353	83518	1511	5420485	145303	6530	80883	4609830
		Kaempferol 3-.alpha.-L-arabinoside	[M-H]-	417.083	C20H18O10	63354	291887	463193	28610	162388	164080	473554	424180	459971	487931	472075	126728
		Kaempferol 3-O-rutinoside	[M+H]+	595.166	C27H30O15	0	0	0	0	0	0	101409	127236	121651	153590	128679	128360
		Kaempferol 3-O-vicianoside	[M+Cl]-	615.112	C26H28O15	0	0	408813	886029	468455	35555	41442	709819	215623	63385	56575	217369
		Kaempferol 3-sophoroside 7-glucoside	[M+Na]+	795.195	C33H40O21	0	4768	0	5416	0	0	28411	46730	35291	39288	24878	25379
		Miquelianin	[M-H]-	477.067	C21H18O13	84245	103447	119276	145432	113675	149583	358470	132162	207456	288373	229255	259340
		Myricetin	[M+H]+	319.045	C15H10O8	0	0	0	0	0	0	37309	63548	68703	80585	52436	109638
		Quercetin	[2M-H]-	603.078	C15H10O7	184160	80966	348222	114674	150363	23791	124149	318295	248886	885706	111134	221602
		Quercetin 3,5,7,3',4'-pentamethyl ether	[M+Na]+	395.11	C20H20O7	11455	6469	8925	11077	10856	11586	7195	7472	8923	9169	3217	7195
		Quercitrin	[M+H]+	449.108	C21H20O11	44982	79126	83563	73627	57220	50361	6837	55478	18778	15022	16670	17572
		Rutin	[M+H]+	611.161	C27H30O16	33814	33814	58989	8638	33814	33814	5524	9374	5069	3903	5524	3751
FLAVONOIDS	3-deoxyanthocyanidins	Apigeninidin-5O glucoside cation	[Cat]+	433.113	C21H21O10	89322	135671	152460	151202	4201	87037	2964312	3513104	4016465	4990043	4833531	5569890
		Luteolinidin-5O glucoside cation	[M+H]+	417.118	C21H20O9	13578	22654	0	23858	0	0	127295	207265	287984	333740	276161	233559
FLAVONOIDS	flavan-3-ols	(+)-Catechin	[M-H-H2O]-	271.061	C15H14O6	47450	47450	77532	9952	47450	54867	54250	45752	11076	9820	18268	227293
		(-)-Catechin gallate	[M-C7H5O5]+	273.076	C22H18O10	0	33349	35126	39230	0	37471	160777	182352	245553	187023	213391	201808
		(-)-Epigallocatechin	[M-H]-	305.067	C15H14O7	34196	83690	118018	95361	147895	408209	248008	145249	83928	38479	134357	176975
		(-)-Gallocatechin 3-gallate	[M+CF3COO]-	571.071	C22H18O11	16214	114470	59736	32665	55771	55771	209682	14471781	25529	2986972	220104	7765
		Catechin 7-arabinofuranoside	[M+H]+	423.129	C20H22O10	14682	13390	18428	21540	9610	16983	33859	40775	39945	35874	32300	32490
FLAVONOIDS	Proanthocyanidins	Procyanidin A1	[M-H]-	575.12	C30H24O12	13593	95378	72012	76555	48938	125597	8482	360870	346912	385199	275406	555682
		Procyanidin B2	[M-H]-	577.135	C30H26O12	39827	26271	21126	89173	55996	302643	67661	41515	549856	50584	816470	502675
		Procyanidin C1	[M-H]-	865.198	C45H38O18	203660	135353	446526	300196	24577	284446	287347	139683	307731	508355	589702	384985
FLAVONOIDS	Curcuminoids	Demethoxycurcumin	[M-H]-	337.108	C20H18O5	61020	71455	28763	69240	97193	75968	95829	33531	20544	75310	44847	54012
HYDROLYZABLE TANNINS	Hydrolyzable tannins	1,2,3,4-Tetragalloylglucose	[M-2H]2-	393.046	C34H28O22	326152	6553	447864	51608	144859	199172	110622	496427	424833	521380	303517	250726
		1,2,3,4,6-Pentagalloyl .beta.-D-glucose	[M-2H]2-	469.052	C41H32O26	6546	0	70079	21483	0	133856	153246	35993	32287	78487	30538	170752
		1,3,6-Tri-O-galloyl-.beta.-D-glucose	[M-H]-	635.089	C27H24O18	107532	14216	174056	59451	102745	158471	137663	279122	167120	119380	78238	44457
		3,4-Di-O-galloylquinic acid	[M-H]-	495.078	C21H20O14	124600	176489	252294	225443	222177	296503	213399	221074	309392	179547	31025	313295
		6-O-p-Coumaroyl-1,2-di-O-galloyl-.beta.-D-glucopyranose	[M-H]-	629.115	C29H26O16	91908	11786	116611	126979	21757	28312	95413	212008	160265	187697	123678	347120
		Quercetagetin-7-O-glucoside	[M-H]-	479.083	C21H20O13	5165	31345	2182	19506	0	22652	31856	140302	195383	300114	77432	96724
LIGNANS	Lignans	(-)-Hydroxymatairesinol	[M+H-H2O]+	357.133	C20H22O7	0	0	0	0	0	0	0	8462	0	6769	6024	7855
		(-)-Secoisolariciresinol	[M-H]-	361.166	C20H26O6	0	0	0	0	0	0	24371	13593	24953	0	25519	0	√
		(-)-Syringaresinol-4-O-.beta.-D-glucopyranoside	[M-H]-	579.208	C28H36O13	75463	67496	123392	43232	67733	75463	0	43405	0	61173	42569	87981	√
		Epipinoresinol-4,4'-di-O-.beta.-D-glucopyranoside	[M+Cl]-	717.217	C32H42O16	230497	273159	426078	297449	239938	28366	243216	327682	323918	1379	294558	40161
		Matairesinoside	[M-H]-	519.187	C26H32O11	61247	50367	31667	60452	48103	50367	16601	34849	0	0	0	0
		Pinoresinol	[M+H-2H2O]+	323.128	C20H22O6	0	24428	0	8461	0	6210	4940	4301	0	0	4283	0
		Secoisolariciresinol diglucoside	[M+Cl]-	721.248	C32H46O16	152174	10560	199800	157475	0	57561	69257	57491	93272	134717	227611	225952	√
		Silydianin	[M+H2O-H]-	499.125	C25H22O10	42910	56648	59014	52364	12716	33809	49101	0	20643	13148	0	44276
STILBENOIDS	Stilbenoids	Deoxyrhapontin	[M+Cl]-	439.116	C21H24O8	0	0	122375	155368	0	121974	33175	33175	16041	33175	69722	13761
		Oxyresveratrol	[2M-H]-	487.14	C14H12O4	54625	54625	65878	54625	82432	15564	320301	138600	138600	138600	9498	86002
		Resveratrol 4'-O-D-glucuronide	[M+H]+	405.118	C20H20O9	46838	95653	93606	102192	67025	63816	82092	82092	82092	86506	77377	82392
		Viniferin	[M-H]-	453.134	C28H22O6	58423	12615	302813	152534	112311	276510	41881	98283	15191	64580	99937	67607

## Sheet: A1
CLASS	SUB-CLASS	Proposed compound	Average CC		SE CC	Average BG		SE BG	Significance	Up/Down	De novo synthesis/Repression
PHENOLIC ACIDS	Hydroxybenzoic acids	Gallic acid	0	±	0	950750	±	32194	/	/	De novo synthesis
		SUMMATION	0			950750
PHENOLIC ACIDS	Hydroxycinnamic acid and derivatives	p-Coumaric acid	219286	±	17899.6	142728	±	48744													METABOANALYST
		4-O-D-Glucopyranosyl-p-coumaric acid	60325.8	±	6632.27	56688.8	±	8793.61								Average CC	SE CC	Average BG	SE BG	Compounds not included in the statistical analysis	Significance	Up/Down	De novo synthesis/Repression
		trans-Cinnamic acid	6190.33	±	1968.37	9482.5	±	2927.15					PHENOLIC ACIDS	Hydroxybenzoic acids	Gallic acid	0	0	950750	32194		/	/	De novo synthesis
		trans-2-Hydroxycinnamic acid	8959.17	±	1738.25	25955.8	±	3431.58	**	Up			PHENOLIC ACIDS	Hydroxycinnamic acid and derivatives	p-Coumaric acid	219286	17899.6	142728	48744
		2-Glucosyloxy-4-methoxycinnamic acid	71102.7	±	14220.1	46940.2	±	7155.78							4-O-D-Glucopyranosyl-p-coumaric acid	60325.8	6632.27	56688.8	8793.61
		2,5-Dimethoxycinnamic acid	1450	±	1029.39	7733.67	±	1001.15	**	Up					trans-Cinnamic acid	6190.33	1968.37	9482.5	2927.15
		3-Hydroxy-4-methoxycinnamic acid	73381.2	±	37228.7	133855	±	42039.8							trans-2-Hydroxycinnamic acid	8959.17	1738.25	25955.8	3431.58		**	Up
		3,4-Dihydroxycinnamic acid (L-alanine methyl ester) amide	12347.8	±	236.658	15749.2	±	4948.87							2-Glucosyloxy-4-methoxycinnamic acid	71102.7	14220.1	46940.2	7155.78
		3,4,5-Trimethoxycinnamic acid	91289.3	±	14535.1	246695	±	8464.31	***	Up					2,5-Dimethoxycinnamic acid	1450	1029.39	7733.67	1001.15		**	Up
		3,5-Dimethoxy-4-hydroxycinnamic acid	81358.5	±	22862.7	147568	±	9893.54							3-Hydroxy-4-methoxycinnamic acid	73381.2	37228.7	133855	42039.8
		1-O-Cinnamoylglucose	170959	±	44776.4	90867.2	±	11596.1							3,4-Dihydroxycinnamic acid (L-alanine methyl ester) amide	12347.8	236.658	15749.2	4948.87
		1,6-Bis-O-(4-hydroxycinnamoyl)glucose	11332.3	±	403.583	10542.2	±	445.164							3,4,5-Trimethoxycinnamic acid	91289.3	14535.1	246695	8464.31		***	Up
		Caffeic acid	10488.7	±	2475.35	31887.3	±	8799.26							3,5-Dimethoxy-4-hydroxycinnamic acid	81358.5	22862.7	147568	9893.54
		Caffeic acid phenethyl ester	46492.2	±	14611.4	5581.33	±	709.347							1-O-Cinnamoylglucose	170959	44776.4	90867.2	11596.1
		Chicoric acid	5844.67	±	2618.59	7879.33	±	1457.96							1,6-Bis-O-(4-hydroxycinnamoyl)glucose	11332.3	403.583	10542.2	445.164
		Di-p-coumaroylputrescine	68238.2	±	17360.7	47620.3	±	9538.28							Caffeic acid	10488.7	2475.35	31887.3	8799.26
		SUMMATION	939046			1.02777e+06									Caffeic acid phenethyl ester	46492.2	14611.4	5581.33	709.347
PHENOLIC ACIDS	Quinic acid and derivatives	Quinic acid	89703.3	±	34350.1	996344	±	45074.9	***	Up					Chicoric acid	5844.67	2618.59	7879.33	1457.96
		1,3-Dicaffeoylquinic acid	76815.2	±	23490.6	2.70932e+06	±	80940.5	***	Up					Di-p-coumaroylputrescine	68238.2	17360.7	47620.3	9538.28
		3-O-Caffeoyl-4-O-sinapoylquinic acid	74064.3	±	19430.2	18850.3	±	7225.23					PHENOLIC ACIDS	Quinic acid and derivatives	Quinic acid	89703.3	34350.1	996344	45074.9		***	Up
		3-O-Feruloylquinic acid	9.93965e+07	±	8.89894e+06	4.73485e+07	±	2.17396e+07							1,3-Dicaffeoylquinic acid	76815.2	23490.6	2.70932e+06	80940.5		***	Up
		3-O-p-Coumaroylquinic acid	55559.2	±	4047.29	206416	±	148819							3-O-Caffeoyl-4-O-sinapoylquinic acid	74064.3	19430.2	18850.3	7225.23
		4-O-Caffeoylquinic acid	73502.7	±	19600	2.36156e+06	±	1.01696e+06							3-O-Feruloylquinic acid	9.93965e+07	8.89894e+06	4.73485e+07	2.17396e+07
		4,5-Di-O-caffeoylquinic acid methyl ester	14810.2	±	2534.54	2.59075e+07	±	553337	***	Up					3-O-p-Coumaroylquinic acid	55559.2	4047.29	206416	148819
		4,5-Dicaffeoylquinic acid	356881	±	19321.4	885106	±	43041	***	Up					4-O-Caffeoylquinic acid	73502.7	19600	2.36156e+06	1.01696e+06
		SUMMATION	1.00138e+08			8.04336e+07									4,5-Di-O-caffeoylquinic acid methyl ester	14810.2	2534.54	2.59075e+07	553337		***	Up
COUMARINS	Coumarins	3-(1,1-Dimethylallyl)-8-hydroxy-7-methoxycoumarin	37594.8	±	8376.19	45201.3	±	12017.7							4,5-Dicaffeoylquinic acid	356881	19321.4	885106	43041		***	Up
		3-[[(5-Methyl-1,3,4-thiadiazol-2-yl)thio]methyl]coumarilic acid	1.07011e+06	±	372964	169893	±	39861.1					COUMARINS	Coumarins	3-(1,1-Dimethylallyl)-8-hydroxy-7-methoxycoumarin	37594.8	8376.19	45201.3	12017.7
		3-Acetyl-7-diethylaminocoumarin	32847.3	±	4226.3	41504.8	±	3544.52							3-[[(5-Methyl-1,3,4-thiadiazol-2-yl)thio]methyl]coumarilic acid	1.07011e+06	372964	169893	39861.1
		3-Cyano-7-(diethylamino)coumarin	86968.2	±	13606.5	59564.5	±	3988.78							3-Acetyl-7-diethylaminocoumarin	32847.3	4226.3	41504.8	3544.52
		6,7-Dihydroxy-4-phenylcoumarin	34121.8	±	2036.03	67674.2	±	27658.7							3-Cyano-7-(diethylamino)coumarin	86968.2	13606.5	59564.5	3988.78
		6,7-Dihydroxycoumarin-4-acetic acid	4881.67	±	1453.65	58858.7	±	12641.3	**	Up					6,7-Dihydroxy-4-phenylcoumarin	34121.8	2036.03	67674.2	27658.7
		6,7-Dimethyl-4-hydroxycoumarin	49433.5	±	6966.19	55071.2	±	15569.4							6,7-Dihydroxycoumarin-4-acetic acid	4881.67	1453.65	58858.7	12641.3		**	Up
		7-Diethylamino-3-formylcoumarin	46407.3	±	7516.61	0	±	0	/	/	Repression				6,7-Dimethyl-4-hydroxycoumarin	49433.5	6966.19	55071.2	15569.4
		7-Hydroxy-3-phenylcoumarin	28102.5	±	9586.44	54760.2	±	5905.96							7-Diethylamino-3-formylcoumarin	46407.3	7516.61	0	0		/	/	Repression
		7-Hydroxy-4-methyl-3-phenylcoumarin	71178.2	±	15008.1	38830.8	±	7249.04							7-Hydroxy-3-phenylcoumarin	28102.5	9586.44	54760.2	5905.96
		7-Hydroxycoumarin-3-carboxylic acid	56471.7	±	14188.6	200817	±	51207							7-Hydroxy-4-methyl-3-phenylcoumarin	71178.2	15008.1	38830.8	7249.04
		7-Hydroxycoumarinyl .gamma.-linolenate	14024.2	±	2756.07	17129.3	±	877.977							7-Hydroxycoumarin-3-carboxylic acid	56471.7	14188.6	200817	51207
		Coumarin-suberoylanilide hydroxamic acid	69563.7	±	12651.4	59591.7	±	21614.1							7-Hydroxycoumarinyl .gamma.-linolenate	14024.2	2756.07	17129.3	877.977
		SUMMATION	1.6017e+06			868896									Coumarin-suberoylanilide hydroxamic acid	69563.7	12651.4	59591.7	21614.1
FLAVONOIDS	Anthocyanins / Anthocyanidins	Cyanin cation	54594.2	±	15455.7	24644.7	±	8825.92					FLAVONOIDS	Anthocyanins / Anthocyanidins	Cyanin cation	54594.2	15455.7	24644.7	8825.92
		Cyanidin 3-O-lathyroside cation	24272	±	4510.6	23713.7	±	5560.82							Cyanidin 3-O-lathyroside cation	24272	4510.6	23713.7	5560.82
		Delphinidin 3-galactoside cation	154198	±	62903.6	262200	±	43706							Delphinidin 3-galactoside cation	154198	62903.6	262200	43706
		Delphinidin-3,5-diglucoside cation	19075.2	±	5695.99	51258.5	±	11861.6							Delphinidin-3,5-diglucoside cation	19075.2	5695.99	51258.5	11861.6
		Pelargonidin cation	102752	±	22091.1	137951	±	23546.1							Pelargonidin cation	102752	22091.1	137951	23546.1
		SUMMATION	354891			499768							FLAVONOIDS	Chalcone and derivatives	Isoliquiritin	4806.17	1126.49	67476.2	7942.32		***	Up
FLAVONOIDS	Chalcone and derivatives	Isoliquiritin	4806.17	±	1126.49	67476.2	±	7942.32	***	Up					2-Hydroxy-3-methoxychalcone	36997.2	8328.74	170286	21471.1		***	Up
		2-Hydroxy-3-methoxychalcone	36997.2	±	8328.74	170286	±	21471.1	***	Up					2'-Hydroxy-3,4,4',5-tetramethoxychalcone	117654	26805.5	145737	28337.3
		2'-Hydroxy-3,4,4',5-tetramethoxychalcone	117654	±	26805.5	145737	±	28337.3							2',4'-Dihydroxy-3'-(2-hydroxybenzyl)-6'-methoxychalcone	33858.3	10697.3	97406.3	10786.5		**	Up
		2',4'-Dihydroxy-3'-(2-hydroxybenzyl)-6'-methoxychalcone	33858.3	±	10697.3	97406.3	±	10786.5	**	Up					4-Benzyloxy-2'-hydroxy-3,4',6'-trimethoxychalcone	68811.3	18468.8	104559	22124.8
		4-Benzyloxy-2'-hydroxy-3,4',6'-trimethoxychalcone	68811.3	±	18468.8	104559	±	22124.8							4',6'-Dimethoxy-2'-hydroxy-4-methylchalcone	51658.8	2188.11	17312.7	4543.31		***	Down
		4',6'-Dimethoxy-2'-hydroxy-4-methylchalcone	51658.8	±	2188.11	17312.7	±	4543.31	***	Down					4',6'-Dimethoxy-4-dimethylamino-2'-hydroxychalcone	2.19829e+06	104722	1.01061e+06	450122
		4',6'-Dimethoxy-4-dimethylamino-2'-hydroxychalcone	2.19829e+06	±	104722	1.01061e+06	±	450122					FLAVONOIDS	Dihydroxychalcones	2,2'-Dihydroxychalcone	11699.7	5021.27	59672.7	17600.2
		SUMMATION	2512073			1613384									2',6'-Dihydroxy 4,4'-dimethoxydihydrochalcone	227568	20548.1	76442.2	13519.7		***	Down
FLAVONOIDS	Dihydroxychalcones	2,2'-Dihydroxychalcone	11699.7	±	5021.27	59672.7	±	17600.2							2',6'-Dihydroxy 4'-methoxydihydrochalcone	35136.3	6330.36	33050.8	1470.83
		2',6'-Dihydroxy 4,4'-dimethoxydihydrochalcone	227568	±	20548.1	76442.2	±	13519.7	***	Down					6''-O-Acetylphloridzin	15465	9020.49	65434.8	14277.2		*	Up
		2',6'-Dihydroxy 4'-methoxydihydrochalcone	35136.3	±	6330.36	33050.8	±	1470.83					FLAVONOIDS	Flavanones	Naringenin	94909.7	16973.3	45267.5	10318
		6''-O-Acetylphloridzin	15465	±	9020.49	65434.8	±	14277.2	*	Up					Liquiritin	58050.8	11582.8	60073.7	6740.13
		SUMMATION	289870			234601									3,5,7,3',4'-Pentahydroxyflavanone	102820	49138.8	417937	50819.7		**	Up
FLAVONOIDS	Flavanones	Naringenin	94909.7	±	16973.3	45267.5	±	10318							7-O-Methyleriodictyol	22908.3	8703.17	7245.33	4860.61
		Liquiritin	58050.8	±	11582.8	60073.7	±	6740.13							Flavanomarein	4.6675e+06	2.5452e+06	2.23244e+06	1.01197e+06
		3,5,7,3',4'-Pentahydroxyflavanone	102820	±	49138.8	417937	±	50819.7	**	Up					Flavanone 7-O-.beta.-D-glucoside	75709.7	17626.2	27053.8	2012.47
		7-O-Methyleriodictyol	22908.3	±	8703.17	7245.33	±	4860.61							Flavanone diacetylhydrazone	2.53306e+06	86150.8	2.97954e+06	117176		*	Up
		Flavanomarein	4.6675e+06	±	2.5452e+06	2.23244e+06	±	1.01197e+06							Helichrysin B	298308	66497.8	278076	38561.2
		Flavanone 7-O-.beta.-D-glucoside	75709.7	±	17626.2	27053.8	±	2012.47							Pinocembrin	36520.7	12431.4	84499.3	27181.1
		Flavanone diacetylhydrazone	2.53306e+06	±	86150.8	2.97954e+06	±	117176	*	Up			FLAVONOIDS	Isoflavones	4'-Acetoxy-7-hydroxy-6-methoxyisoflavone	22233.2	6002.81	24470.7	11093
		Helichrysin B	298308	±	66497.8	278076	±	38561.2							4',5,7-Trihydroxy-6,8-diprenylisoflavone	63105.3	10836.3	16795	9545.68		**	Down
		Pinocembrin	36520.7	±	12431.4	84499.3	±	27181.1							6''-O-Acetyldaidzin	6090.67	602.379	0	0		/	/	Repression
		SUMMATION	7.88979e+06			6.13213e+06									6''-O-Malonyldaidzin	36394.3	5409.77	20156.3	2163.4
FLAVONOIDS	Isoflavones	4'-Acetoxy-7-hydroxy-6-methoxyisoflavone	22233.2	±	6002.81	24470.7	±	11093							6''-O-Malonylgenistin	2119.17	16.9124	65398.3	4750.85		***	Up
		4',5,7-Trihydroxy-6,8-diprenylisoflavone	63105.3	±	10836.3	16795	±	9545.68	**	Down			FLAVONOIDS	Flavones	Apiin	39586.2	4958.57	38727.7	10267.3
		6''-O-Acetyldaidzin	6090.67	±	602.379	0	±	0	/	/	Repression				Apigenin	30707.3	16764.8	143007	33636.9		*	Up
		6''-O-Malonyldaidzin	36394.3	±	5409.77	20156.3	±	2163.4							3,8''-Biapigenin	223034	23297.1	445194	45018		**	Up
		6''-O-Malonylgenistin	2119.17	±	16.9124	65398.3	±	4750.85	***	Up					Luteolin	140660	29258	186066	37425
		SUMMATION	129943			126820									Luteolin 7-methyl ether	112050	77462	1.5126e+06	328915		**	Up
FLAVONOIDS	Flavones	Apiin	39586.2	±	4958.57	38727.7	±	10267.3							Luteolin-7,3'-di-O-glucoside	225866	75121.7	130272	17624.7
		Apigenin	30707.3	±	16764.8	143007	±	33636.9	*	Up					3,4-Diphenylmethylideneluteolin	8.00354e+06	4.09568e+06	458708	341647
		3,8''-Biapigenin	223034	±	23297.1	445194	±	45018	**	Up					7-O-Benzylluteolin	55182.7	13904.8	53747.3	17107.7
		Luteolin	140660	±	29258	186066	±	37425							8-C-(2-Rhamnosyl-6-deoxyhexopyranosulyl)luteolin	18778.7	2123.01	18380	8000.63
		Luteolin 7-methyl ether	112050	±	77462	1.5126e+06	±	328915	**	Up					3,7-Dihydroxy-3',4'-dimethoxyflavone	7668	4181.47	4681.83	114.932
		Luteolin-7,3'-di-O-glucoside	225866	±	75121.7	130272	±	17624.7							3',4'-Dihydroxy-.alpha.-naphthoflavone	307520	3742.21	625974	158474
		3,4-Diphenylmethylideneluteolin	8.00354e+06	±	4.09568e+06	458708	±	341647							3',4',5,7-Tetrahydroxy-3,6,8-trimethoxyflavone	35151.3	12688.6	67316.3	21891.7
		7-O-Benzylluteolin	55182.7	±	13904.8	53747.3	±	17107.7							3',4',5,7-Tetrahydroxy-6,8-dimethoxyflavone	64830.7	17779.9	272630	67313.2		*	Up
		8-C-(2-Rhamnosyl-6-deoxyhexopyranosulyl)luteolin	18778.7	±	2123.01	18380	±	8000.63							3',4',5',5,6,7-Hexamethoxyflavone	3948.83	640.953	3412.83	608.21
		3,7-Dihydroxy-3',4'-dimethoxyflavone	7668	±	4181.47	4681.83	±	114.932							4',5,7-Trihydroxy 3,3',6,8-tetramethoxyflavone	1.13162e+07	3.36143e+06	1.84069e+06	680235
		3',4'-Dihydroxy-.alpha.-naphthoflavone	307520	±	3742.21	625974	±	158474							Baicalin	102882	33837.3	212783	67080.9
		3',4',5,7-Tetrahydroxy-3,6,8-trimethoxyflavone	35151.3	±	12688.6	67316.3	±	21891.7							Isoginkgetin	46306.7	13424	83875.8	33584.7
		3',4',5,7-Tetrahydroxy-6,8-dimethoxyflavone	64830.7	±	17779.9	272630	±	67313.2	*	Up					Isoorientin	129599	29385.2	585869	38489.1		***	Up
		3',4',5',5,6,7-Hexamethoxyflavone	3948.83	±	640.953	3412.83	±	608.21							Mosloflavone	24992.7	5175.66	83818.7	31097
		4',5,7-Trihydroxy 3,3',6,8-tetramethoxyflavone	1.13162e+07	±	3.36143e+06	1.84069e+06	±	680235							Saponarin	31234.3	5959.12	26225.5	14737.8
		Baicalin	102882	±	33837.3	212783	±	67080.9							Skullcapflavone II	114405	36803.6	165606	38847.2
		Isoginkgetin	46306.7	±	13424	83875.8	±	33584.7							Volkensiflavone	99571.3	45022.3	145134	49799
		Isoorientin	129599	±	29385.2	585869	±	38489.1	***	Up			FLAVONOIDS	Flavonols	6''-O-(3-Hydroxy-3-methylglutaroyl)hyperin	116444	20286.1	122431	22309.7
		Mosloflavone	24992.7	±	5175.66	83818.7	±	31097							6''-O-Malonylisoquercitrin	16804	10631.6	297318	92052.4		***	Up
		Saponarin	31234.3	±	5959.12	26225.5	±	14737.8							Afzelin	112458	57379.8	248925	126460
		Skullcapflavone II	114405	±	36803.6	165606	±	38847.2							Isoquercitin	75195.3	27433.1	1710757	1.05039e+06
		Volkensiflavone	99571.3	±	45022.3	145134	±	49799							Kaempferol 3-.alpha.-L-arabinoside	195585	65408.6	407406	56823.3
		SUMMATION	2.11338e+07			7.10472e+06									Kaempferol 3-O-rutinoside	0	0	126821	6819.26		/	/	De novo synthesis
FLAVONOIDS	Flavonols	6''-O-(3-Hydroxy-3-methylglutaroyl)hyperin	116444	±	20286.1	122431	±	22309.7							Kaempferol 3-O-vicianoside	299809	145325	217369	103767
		6''-O-Malonylisoquercitrin	16804	±	10631.6	297318	±	92052.4	***	Up					Kaempferol 3-sophoroside 7-glucoside	1697.33	1076.74	33329.5	3548.5		***	Up
		Afzelin	112458	±	57379.8	248925	±	126460							Miquelianin	119276	10184.5	245843	31277.2		**	Up
		Isoquercitin	75195.3	±	27433.1	1710757	±	1.05039e+06							Myricetin	0	0	68703.2	10154.8		/	/	De novo synthesis
		Kaempferol 3-.alpha.-L-arabinoside	195585	±	65408.6	407406	±	56823.3							Quercetin	150363	45607.2	318295	117860
		Kaempferol 3-O-rutinoside	0	±	0	126821	±	6819.26	/	/	De novo synthesis				Quercetin 3,5,7,3',4'-pentamethyl ether	10061.3	819.067	7195.17	871.471
		Kaempferol 3-O-vicianoside	299809	±	145325	217369	±	103767							Quercitrin	64813.2	6567.33	21726.2	6969.78		**	Down
		Kaempferol 3-sophoroside 7-glucoside	1697.33	±	1076.74	33329.5	±	3548.5	***	Up					Rutin	33813.8	6500.29	5524.17	832.68		**	Down
		Miquelianin	119276	±	10184.5	245843	±	31277.2	**	Up			FLAVONOIDS	3-deoxyanthocyanidins	Apigeninidin-5O glucoside cation	103316	23122.6	4.31456e+06	402319		***	Up
		Myricetin	0	±	0	68703.2	±	10154.8	/	/	De novo synthesis				Luteolinidin-5O glucoside cation	10015	4708.04	244334	29495.8		***	Up
		Quercetin	150363	±	45607.2	318295	±	117860					FLAVONOIDS	flavan-3-ols	(+)-Catechin	47450.2	8880.76	61076.5	34092.6
		Quercetin 3,5,7,3',4'-pentamethyl ether	10061.3	±	819.067	7195.17	±	871.471							(-)-Catechin gallate	24196	7694.98	198484	11919.4		***	Up
		Quercitrin	64813.2	±	6567.33	21726.2	±	6969.78	**	Down					(-)-Epigallocatechin	147895	54303.3	137833	29729.2
		Rutin	33813.8	±	6500.29	5524.17	±	832.68	**	Down					(-)-Gallocatechin 3-gallate	55771.2	13613.6	2.98697e+06	2.34461e+06
		SUMMATION	1.19632e+06			3.83164e+06									Catechin 7-arabinofuranoside	15772.2	1699.24	35873.8	1515.23		***	Up
FLAVONOIDS	3-deoxyanthocyanidins	Apigeninidin-5O glucoside cation	103316	±	23122.6	4.31456e+06	±	402319	***	Up			FLAVONOIDS	Proanthocyanidins	Procyanidin A1	72012.2	15687.7	322092	73302.4		**	Up
		Luteolinidin-5O glucoside cation	10015	±	4708.04	244334	±	29495.8	***	Up					Procyanidin B2	89172.7	43852.9	338127	134725
		SUMMATION	113330			4.55889e+06									Procyanidin C1	232460	59606.9	369634	66179
FLAVONOIDS	flavan-3-ols	(+)-Catechin	47450.2	±	8880.76	61076.5	±	34092.6					FLAVONOIDS	Curcuminoids	Demethoxycurcumin	67273.2	9154.76	54012.2	11292.8
		(-)-Catechin gallate	24196	±	7694.98	198484	±	11919.4	***	Up			HYDROLYZABLE TANNINS	Hydrolyzable tannins	1,2,3,4-Tetragalloylglucose	196035	68249.5	351251	64735.5
		(-)-Epigallocatechin	147895	±	54303.3	137833	±	29729.2							1,2,3,4,6-Pentagalloyl .beta.-D-glucose	38660.7	21882.2	83550.5	25940.4
		(-)-Gallocatechin 3-gallate	55771.2	±	13613.6	2.98697e+06	±	2.34461e+06							1,3,6-Tri-O-galloyl-.beta.-D-glucose	102745	24444	137663	33382.3
		Catechin 7-arabinofuranoside	15772.2	±	1699.24	35873.8	±	1515.23	***	Up					3,4-Di-O-galloylquinic acid	216251	24385.8	211289	42281.7
		SUMMATION	291084			3.42024e+06									6-O-p-Coumaroyl-1,2-di-O-galloyl-.beta.-D-glucopyranose	66225.5	21030	187697	36228
FLAVONOIDS	Proanthocyanidins	Procyanidin A1	72012.2	±	15687.7	322092	±	73302.4	**	Up					Quercetagetin-7-O-glucoside	13475	5222.04	140302	39236.9		**	Up
		Procyanidin B2	89172.7	±	43852.9	338127	±	134725					LIGNANS	Lignans	(-)-Syringaresinol-4-O-.beta.-D-glucopyranoside	75463.2	10738.2	39188	14100.5
		Procyanidin C1	232460	±	59606.9	369634	±	66179							Epipinoresinol-4,4'-di-O-.beta.-D-glucopyranoside	249248	52722.9	205152	59807.1
		SUMMATION	393644			1.02985e+06									Matairesinoside	50367.2	4377.58	8575	5912.87		***	Down
FLAVONOIDS	Curcuminoids	Demethoxycurcumin	67273.2	±	9154.76	54012.2	±	11292.8							Secoisolariciresinol diglucoside	96261.7	34497.5	134717	31048.2
		SUMMATION	67273.2			54012.2									Silydianin	42910.2	7145.99	21194.7	8708.22
HYDROLYZABLE TANNINS	Hydrolyzable tannins	1,2,3,4-Tetragalloylglucose	196035	±	68249.5	351251	±	64735.5					STILBENOIDS	Stilbenoids	Deoxyrhapontin	66619.5	30201.3	33174.8	8177.53
		1,2,3,4,6-Pentagalloyl .beta.-D-glucose	38660.7	±	21882.2	83550.5	±	25940.4							Oxyresveratrol	54624.8	8991.89	138600	41812.7
		1,3,6-Tri-O-galloyl-.beta.-D-glucose	102745	±	24444	137663	±	33382.3							Resveratrol 4'-O-D-glucuronide	78188.3	9005.41	82091.8	1180.46
		3,4-Di-O-galloylquinic acid	216251	±	24385.8	211289	±	42281.7							Viniferin	152534	47611.6	64579.8	13353.8
		6-O-p-Coumaroyl-1,2-di-O-galloyl-.beta.-D-glucopyranose	66225.5	±	21030	187697	±	36228
		Quercetagetin-7-O-glucoside	13475	±	5222.04	140302	±	39236.9	**	Up
		SUMMATION	633392			1111752
LIGNANS	Lignans	(-)-Syringaresinol-4-O-.beta.-D-glucopyranoside	75463.2	±	10738.2	39188	±	14100.5
		Epipinoresinol-4,4'-di-O-.beta.-D-glucopyranoside	249248	±	52722.9	205152	±	59807.1
		Matairesinoside	50367.2	±	4377.58	8575	±	5912.87	***	Down
		Secoisolariciresinol diglucoside	96261.7	±	34497.5	134717	±	31048.2
		Silydianin	42910.2	±	7145.99	21194.7	±	8708.22
		SUMMATION	514250			408827
STILBENOIDS	Stilbenoids	Deoxyrhapontin	66619.5	±	30201.3	33174.8	±	8177.53
		Oxyresveratrol	54624.8	±	8991.89	138600	±	41812.7
		Resveratrol 4'-O-D-glucuronide	78188.3	±	9005.41	82091.8	±	1180.46
		Viniferin	152534	±	47611.6	64579.8	±	13353.8
		SUMMATION	351967			318447

## Sheet: B
	EXP1			EXP2			EXP1			EXP2
SUB-CLASS	CC.1	CC.2	CC.3	CC.4	CC.5	CC.6	BG.1	BG.2	BG.3	BG.4	BG.5	BG.6
Hydroxybenzoic acids	0	0	0	0	0	0	875279	943179	1055868	1028038	859954	942185
Hydroxycinnamic acid and derivatives	772357	823224	846305	807963	1362210	1022219	1060461	932420	945692	958639	836194	1433236
Quinic acid and derivatives	78260113	95242372	76615694	111360071	105248124	134100476	150191789	142558380	60737115	43013498	44474383	41626554
Coumarins	904699	3081475	1636466	2396680	885065	705821	950468	1062909	953072	741268	521735	983925
Anthocyanins / Anthocyanidins	485273	271355	232257	289419	521617	329427	343087	548557	588804	727636	437068	353458
Chalcone and derivatives	2614937	2712939	2634587	2566592	2135922	2407461	3469042	1750315	1771931	557431	1542199	589386
Dihydroxychalcones	259919	355703	296921	283063	320377	223234	201813	204417	311245	298533	236479	155116
Flavanones	20416541	6314462	5843620	4893450	4371991	5498668	4523747	7840669	4612748	3932081	10020380	5863176
Isoflavones	163191	119605	140535	88065	150574	117686	145938	139426	112550	114825	110402	137781
Flavones	31616705	31350512	11409782	9119598	30270011	13035967	5017522	8643161	5263003	10318648	6145535	7240424
Flavonols	595654	807553	1998363	1671776	1354513	750059	1592763	7590156	2272115	2919103	1922082	6693639
3-deoxyanthocyanidins	102900	158325	152460	175060	4201	87037	3091607	3720369	4304449	5323783	5109692	5803449
flavan-3-ols	112542	292349	308840	198748	260726	573301	706576	14885909	406031	3258168	618420	646331
Proanthocyanidins	257080	257002	539664	465924	129511	712686	363490	542068	1204499	944138	1681578	1443342
Curcuminoids	61020	71455	28763	69240	97193	75968	95829	33531	20544	75310	44847	54012
Hydrolyzable tannins	661903	240389	1063086	504470	491538	838966	742199	1384926	1289280	1386605	644428	1223074
Lignans	562291	458230	839951	610972	368490	245566	378175	463427	437833	210417	564738	398370
Stilbenoids	159886	162893	584672	464719	261768	477864	477449	352150	251924	322861	256534	249762

## Sheet: B1
CLASS	SUB-CLASS	Average CC		SE CC	Average BG		SE BG	Significance	Up/Down
PHENOLIC ACIDS	Hydroxybenzoic acids	0	±	0	950750	±	32194	/	/
	Hydroxycinnamic acid and derivatives	939046	±	91827.6	1.02777e+06	±	86174.3
	Quinic acid and derivatives	1.00138e+08	±	8.87206e+06	8.04336e+07	±	2.10657e+07
	SUMMATION	1.01077e+08			82412144
COUMARINS	Coumarins	1601701	±	392637	868896	±	81939.4
	SUMMATION	1601701			868896
FLAVONOIDS	Anthocyanins / Anthocyanidins	354891	±	48904.5	499768	±	61133.3
	Chalcone and derivatives	2512073	±	85895.9	1613384	±	434205
	Dihydroxychalcones	289870	±	18884	234600	±	24677.3
	Flavanones	7.88979e+06	±	2.52097e+06	6.13213e+06	±	963424
	Isoflavones	129943	±	11036.5	126820	±	6484.9
	Flavones	2.11338e+07	±	4.48038e+06	7.10472e+06	±	844253
	Flavonols	1.19632e+06	±	231333	3831643	±	1.06835e+06
	3-deoxyanthocyanidins	113330	±	25868.6	4.55889e+06	±	422617	***	Up
	flavan-3-ols	291084	±	63584.1	3.42024e+06	±	2.3344e+06
	Proanthocyanidins	393644	±	88585.4	1.02985e+06	±	209407
	Curcuminoids	67273.2	±	9154.76	54012.2	±	11292.8
	SUMMATION	3.4372e+07			2.86061e+07
HYDROLYZABLE TANNINS	Hydrolyzable tannins	633392	±	118167	1111752	±	135282
	SUMMATION	633392			1111752
LIGNANS	Lignans	514250	±	84522.1	408827	±	47800.3
	SUMMATION	514250			408827
STILBENOIDS	Stilbenoids	351967	±	73822.9	318447	±	36246
	SUMMATION	351967			318447

## Sheet: C
	EXP1			EXP2			EXP1			EXP2
CLASS	CC.1	CC.2	CC.3	CC.4	CC.5	CC.6	BG.1	BG.2	BG.3	BG.4	BG.5	BG.6
PHENOLIC ACIDS	79032470	96065596	77461999	112168034	106610334	135122695	152127529	144433979	62738675	45000175	46170531	44001975
COUMARINS	904699	3081475	1636466	2396680	885065	705821	950468	1062909	953072	741268	521735	983925
FLAVONOIDS	56685762	42711260	23585792	19820935	39616636	23811494	19551414	45898578	20867919	28469656	27868682	28980114
HYDROLYZABLE TANNINS	661903	240389	1063086	504470	491538	838966	742199	1384926	1289280	1386605	644428	1223074
LIGNANS	562291	458230	839951	610972	368490	245566	378175	463427	437833	210417	564738	398370
STILBENOIDS	159886	162893	584672	464719	261768	477864	477449	352150	251924	322861	256534	249762

## Sheet: C1
CLASS	Average CC		SE CC	Average BG		SE BG	Significance	Up/Down
PHENOLIC ACIDS	1.01077e+08	±	8.9097e+06	82412144	±	2.10416e+07
COUMARINS	1601701	±	392637	868896	±	81939.4
FLAVONOIDS	3.4372e+07	±	5.8724e+06	2.86061e+07	±	3.83666e+06
HYDROLYZABLE TANNINS	633392	±	118167	1111752	±	135282
LIGNANS	514250	±	84522.1	408827	±	47800.3
STILBENOIDS	351967	±	73822.9	318447	±	36246
TOTAL SUMMATION	1.3855e+08			1.13726e+08

## Sheet: D
Proposed compounds	t.stat	p.value	#NAME?	FDR
4,5-Di-O-caffeoylquinic acid methyl ester	46.793	4.79e-13	12.32	6.23e-11
1,3-Dicaffeoylquinic acid	31.235	2.66e-11	10.576	1.73e-09
Quinic acid	16.029	1.85e-08	7.734	6e-07
6''-O-Malonylgenistin	13.319	1.09e-07	6.963	2.36e-06
(-)-Catechin gallate	12.763	1.63e-07	6.7871	3.03e-06
4,5-Dicaffeoylquinic acid	11.196	5.59e-07	6.2525	9.09e-06
Apigeninidin-5O glucoside cation	10.45	1.06e-06	5.9746	1.53e-05
Isoorientin	9.4224	2.73e-06	5.5631	3.56e-05
3,4,5-Trimethoxycinnamic acid	9.2393	3.27e-06	5.4859	3.86e-05
Catechin 7-arabinofuranoside	8.8293	4.91e-06	5.3086	4.91e-05
Kaempferol 3-sophoroside 7-glucoside	8.4803	7.04e-06	5.1524	6.54e-05
Luteolinidin-5O glucoside cation	7.8216	1.43e-05	4.8435	0.0001177
Isoliquiritin	7.8124	1.45e-05	4.8391	0.0001177
4',6'-Dimethoxy-2'-hydroxy-4-methylchalcone	-6.811	4.68e-05	4.33	0.00035766
2',6'-Dihydroxy 4,4'-dimethoxydihydrochalcone	-6.1441	0.00010916	3.9619	0.00078839
2-Hydroxy-3-methoxychalcone	5.7876	0.0001759	3.7547	0.0011127
Matairesinoside	-5.7717	0.00017975	3.7453	0.0011127
Quercitrin	-4.4993	0.0011444	2.9414	0.0064682
3,5,7,3',4'-Pentahydroxyflavanone	4.4576	0.0012206	2.9134	0.0066116
trans-2-Hydroxycinnamic acid	4.4185	0.0012972	2.887	0.0067453
3,8''-Biapigenin	4.3828	0.0013714	2.8628	0.0068569
2,5-Dimethoxycinnamic acid	4.3393	0.0014679	2.8333	0.0070607
Rutin	-4.3168	0.0015208	2.8179	0.0070607
6,7-Dihydroxycoumarin-4-acetic acid	4.2387	0.00172	2.7645	0.0077104
2',4'-Dihydroxy-3'-(2-hydroxybenzyl)-6'-methoxychalcone	4.2002	0.0018282	2.738	0.0079223
Luteolin 7-methyl ether	4.1439	0.0019994	2.6991	0.0083844
Miquelianin	3.8478	0.003224	2.4916	0.013098
Procyanidin A1	3.3361	0.0075403	2.1226	0.029704
4',5,7-Trihydroxy-6,8-diprenylisoflavone	-3.2041	0.0094259	2.0257	0.035097
Quercetagetin-7-O-glucoside	3.2026	0.0094492	2.0246	0.035097
Flavanone diacetylhydrazone	3.0699	0.011843	1.9265	0.042768
6''-O-Malonylisoquercitrin	2.9905	0.013562	1.8677	0.046007
3',4',5,7-Tetrahydroxy-6,8-dimethoxyflavone	2.9847	0.013697	1.8634	0.046007
Apigenin	2.9802	0.013802	1.8601	0.046007
6''-O-Acetylphloridzin	2.9446	0.01467	1.8336	0.047678
